# Supplementary material
Source: PubMed Central journal article supplement (PMC6288199)
Supplement: mmc1.pdf [file mmc1.pdf]

**The American Journal of Human Genetics, Volume 103**

## **Supplemental Data**

### **The Genetic Ancestry of Modern Indus Valley**

#### **Populations from Northwest India**

**Ajai K. Pathak, Anurag Kadian, Alena Kushniarevich, Francesco Montinaro, Mayukh Mondal, Linda Ongaro, Manvendra Singh, Pramod Kumar, Niraj Rai, Jüri Parik, Ene Metspalu, Siiri Rootsi, Luca Pagani, Toomas Kivisild, Mait Metspalu, Gyaneshwer Chaubey, and Richard Villems**

## Contents

|                                                                                                                                                                                    |           |
|------------------------------------------------------------------------------------------------------------------------------------------------------------------------------------|-----------|
| Supplemental Text.....                                                                                                                                                             | 3         |
| Supplementary Figures.....                                                                                                                                                         | 7         |
| <b>Figure S1. Principal Component Analysis (PCA) using haplogroup frequencies in South Asians, Iranians and Central Asians (A) mtDNA PC plot and (B) Y-chromosome PC plot.....</b> | <b>7</b>  |
| <b>Figure S2. Genome-wide structure and genetic differentiation of Northwest India (NWI) (A) PCA of NWI with Eurasians.....</b>                                                    | <b>8</b>  |
| <b>Figure S3. Genetic structure of PNWI in context of ancient DNA: (A) PC plot for modern Eurasians with a subset of ancient sources.....</b>                                      | <b>9</b>  |
| <b>Figure S4. Cross-Validation for ADMIXTURE run.....</b>                                                                                                                          | <b>10</b> |
| <b>Figure S5. Derived allele sharing between modern PNWI and Eurasian groups.....</b>                                                                                              | <b>11</b> |
| <b>Figure S6. Comparing Outgroup <math>f_3</math> for PNWI groups with ancient sources (A) Steppe_EMBA vs Iran_N.....</b>                                                          | <b>13</b> |
| <b>Figure S7. Outgroup <math>f_3</math> for South Asians and West Eurasians with ancient sources (A) EHG, (B) Anatolia_N, (C) Iran_N and (D) Steppe_EMBA.....</b>                  | <b>15</b> |
| <b>Figure S8. <math>D</math> statistics of South Asians with distant ancient sources (A) EHG vs Steppe_EMBA scatter plot.....</b>                                                  | <b>16</b> |
| <b>Figure S9. <math>D</math> statistics comparing allele sharing of South Asians with proximal ancient sources.....</b>                                                            | <b>19</b> |
| <b>Figure S10. LD Decay Curve for ALDER run (A) and (B) Ror.....</b>                                                                                                               | <b>21</b> |
| <b>Figure S11. Maximum Likelihood tree of <i>TreeMix</i>.....</b>                                                                                                                  | <b>22</b> |
| <b>Figure S12. Runs of Homozygosity suggesting high density and population size for Ror.....</b>                                                                                   | <b>23</b> |
| <b>Figure S13. Mean Chunk received by PNWI and NI_IE (A) Chunks received from across Eurasia.....</b>                                                                              | <b>24</b> |
| <b>Figure S14. NNLS based Ancestry estimated for PNWI and neighboring populations (A) All populations as donor.....</b>                                                            | <b>25</b> |
| <b>Figure S15. Correlation of IBD sharing of Ror with Steppe Ancestry in Europeans.....</b>                                                                                        | <b>26</b> |
| Supplemental Tables.....                                                                                                                                                           | 27        |
| <b>Table S1. Details of modern populations and number of overlapping SNPs used for genome-wide data analyses of the study.....</b>                                                 | <b>27</b> |
| <b>Table S2. Detail information of ancient samples used in various analyses of this study.....</b>                                                                                 | <b>27</b> |
| <b>Table S3. Mitochondrial genotyping in sampled Northwest Indians.....</b>                                                                                                        | <b>27</b> |
| <b>Table S4. Y-chromosomal genotyping in sampled Northwest Indians.....</b>                                                                                                        | <b>28</b> |
| <b>Table S5. The population wise <math>F_{ST}</math> values based on autosomal dataset of studied populations.....</b>                                                             | <b>28</b> |
| <b>Table S6. Formal test of admixture for PNWI and Gangetic Plain populations.....</b>                                                                                             | <b>29</b> |
| <b>Table S7. <math>D</math> statistics to test if Ror and Kalash belong to same clade.....</b>                                                                                     | <b>31</b> |
| <b>Table S8. Gene flow among PNWI and NI_IE and their relative affinity with Europe.....</b>                                                                                       | <b>32</b> |
| <b>Table S9. <math>D</math> statistics for relative allele sharing of South Asians with a set of distal ancient sources.....</b>                                                   | <b>33</b> |

|                                                                                                                               |           |
|-------------------------------------------------------------------------------------------------------------------------------|-----------|
| <b>Table S10. <i>D</i> statistics for relative allele sharing of South Asians with a set of proximal ancient sources.....</b> | <b>34</b> |
| <b>Table S11. <i>qpAdm</i> with Steppe_MLBA.....</b>                                                                          | <b>35</b> |
| <b>Table S12. <i>qpAdm</i> with Steppe_EMBA.....</b>                                                                          | <b>36</b> |
| <b>Table S13. <i>qpAdm</i> with both Steppe_EMBA and Steppe_MLBA.....</b>                                                     | <b>37</b> |
| <b>Table S14. <i>qpAdm</i> using proximal model with Namazga_CA.....</b>                                                      | <b>38</b> |
| <b>Table S15. <i>qpAdm</i> using proximal model with Indus_Periphery (Indus_Diaspora)...</b>                                  | <b>39</b> |
| <b>Table S16. <i>qpWave</i> results.....</b>                                                                                  | <b>40</b> |
| <b>Table S17. Cross-validation for the unbiasedness due to varying sample sizes.....</b>                                      | <b>41</b> |
| <b>Table S18. ALDER dating for admixture in Northwest Indians.....</b>                                                        | <b>42</b> |
| <b>Table S19. standard error for NNLS with jack-knife method.....</b>                                                         | <b>43</b> |
| <b>References:.....</b>                                                                                                       | <b>44</b> |

## Supplemental Text

### Indus Valley Civilization and its antiquity

Alongside those developed in ancient Egypt and Mesopotamia, the Indus Valley Civilization was among the greatest early civilizations of the Old World during the early- to mid-third millennium BCE<sup>1-3</sup>. The Indus Valley Civilization extending across present-day Northwest Pakistan deep into Northwestern India had major settlements established on the plains between Indus and Ganges basin, with an urban-phase beginning ~4.6 kya BP<sup>3,4</sup>. This Civilization thrived in the Indus River basin<sup>5,6</sup> that flows through the whole Pakistan, and along a network of recurrent, monsoon-fed rivers that on one occasion flowed near Ghaggar-Hakra river, which is also known as Sarasvati (now dried up) in northwest India and eastern Pakistan<sup>3,7,8</sup>.

Though so far, the least studied among the three, the emerging archaeological evidence suggests that the Indus Valley one (earlier often called narrowly as Harappan), might have been the most widespread encircling an area of ~1 million square km and the largest of the Bronze Age developed civilization<sup>2,9</sup>. During its peak, this Civilization possibly has had a population of about five million<sup>10</sup>.

Archaeologists link the urbanism of the Indus Valley with the expansion of five huge settlements considered as cities, and several minor built-ups that are categorized by typical architectural elements and material culture<sup>1,3,11</sup>. The Indus Valley Civilization is also known as the Harappan Civilization after Harappa a place in the Punjab province of British India and now in Pakistan, where the first excavation had happened<sup>12</sup>. Mohenjo-daro was another main site of Indus Valley Civilization, discovered soon after the Harappa, whereas, other major urban centers were Dholavira, Ganeriwala, and Rakhigarhi<sup>3</sup>.

Mehrgarh, a Neolithic site (~7000 BCE to c. 2500 BCE) located at the west of the Indus river valley, was considered to be one of the earliest center of the civilization with an indication of early farming and cattle herding in South Asia<sup>13-16</sup> and shift from foraging to settled agriculture and domestication<sup>17</sup>. Though a recent study links the spread of Neolithic farming into Northwest India from the Near East, they also found a decent signal for the indigenous domestication of barley, and zebu cattle at Mehrgarh similar to the humped Indian aurochs that is frequently depicted on Indus seals<sup>15,18</sup>.

There are also archaeological traces of trade seals, decked with animals and mythical existences, demonstrating the Indus people's involvement in booming trade with faraway lands like Sumer in Mesopotamia<sup>21</sup>. Excavation of archaeological artifacts from Iraq, Central Asia, and Afghanistan e.g., the occurrence of Indus seals in Central Asia besides Iraq, and portable Indus beads, pottery across Iranian plateau, Oman and Mesopotamia, display the extended Indus trade networks<sup>2,5</sup>.

The abrupt fall of the Indus Valley Civilization, which flourished from 2600 BCE until 1900 BCE, is highly debatable issue. Many theories like floods, tectonic shifts, droughts, and foreign invaders have been invoked to explain the remarkable sudden and entire disappearance of this thriving civilization<sup>5,9,22-24</sup>. Many scholars proposed that climate must have had an indirect effect on the Indus Valley<sup>25,26</sup> facilitating the drying-up of mighty river Sarasvati (Ghaghra Hakkar). It has been also proposed that these events triggered the migration of Indus people towards Gangetic plain<sup>22,23</sup>, along

with the theory of strategic local shifts in agriculture during extended droughts in 2200 BC by Madella and Fuller<sup>27</sup>. Nevertheless, none of the theories could solve this puzzle satisfactorily so far.

## **Studied Populations:**

### **Ror**

Ror is a Kshatriya community from Northwest India, especially from Haryana state that counts almost 750,000 in number all over India<sup>28</sup>. They have their roots primarily from an area, extending across the Gujarat – Rajasthan border<sup>28</sup>. Historically the Ror people were found concentrated around Ror (Sukkur) in Sindh region of Pakistan<sup>28</sup> but, now they found mainly in Haryana, Rajasthan, Himachal Pradesh, western Uttar Pradesh and Uttaranchal in India. H. A. Rose describes the Ror as fine, stalwart men in his famous work “*A Glossary of the Tribes and Castes of Punjab and North-West Frontier Provinces*”<sup>29</sup>. A.C.L. Carleyle also reports about the finding of a Ror warrior image at the site of Kaga Ror or Kagarol in the Archaeological Survey of India Report for the year 1871-72<sup>30</sup>. Ror Mahasabha claims that Sir Denzil Ibbetson classified Ror as one of the “Other dominant tribes” of United Punjab during the British rule in India<sup>31</sup>. In fact, the Ror people vary from other neighboring groups in their lifestyle like ethnic wears etc.

Conferring to the Indian Puranic tradition, Ror claim to belong to the solar race of *Ikshvaku Kul* and connect themselves to Lord *Sri Rama*, the hero of epic *Ramayana*.

Ror clans ruled from the Rori, also known by names of Roruka and Rorik since ancient times. It was the capital of Sindh for years and has been mentioned as one of the most important Indian cities during seventh century B.C.<sup>32</sup>. During first few centuries and a couple of centuries prior to the Christian era, Ror have ruling seats of power in Gujarat, Rajasthan, Haryana, and Sindh; and afterward, in the 5th century AD, they consolidated their influence in the entire region from Afghanistan to Kannauj in India during the time of *rai Dewaji*<sup>34,35</sup>.

### **Gujjar (Gurjar)**

Gujjar also known as Gurjar, a pastoral ethnic group of India and Pakistan that used to be nomadic earlier<sup>36</sup>. The other synonymous of Gujjar are *Gurjjar*, *Gurjara*, *Gojar* and *Gūjar*<sup>37–39</sup>.

The term Gujjar is derived from the Sanskrit word *gurjara*, which many scholars refer to the word *Gurjaratra* or *Gujarat*. The Gurjar origin is debatable, Cunningham<sup>40</sup> places them among Scythian tribe who conquered the Kabul around 100 BC and came to India and established the *Gujjara* or *Gurjara* kingdom while Smith<sup>41</sup> traces their origin to the white Huns who came to India around AD 465 as nomadic hordes.

In the 6<sup>th</sup> to 12<sup>th</sup> century, the Gujjar were primarily classified into Kshatriya and Brahmins many of whom are converted to Islam during Muslim rule in South Asia<sup>42,43</sup>. In some states in India, Gujjar are classified under the Other Backward Class (OBC)<sup>44</sup>, Hindu Gujjars are now assimilated into several vernas. Many Gujjars link themselves with *Ramayana*<sup>45</sup>, claiming that they are related with legendary hero *Lakshmana* brother of *Lord Rama*<sup>46,47</sup>. They claim to be *Suryavanshi* Kshatriya<sup>48</sup>.

Gujjar of Northwestern India have ethnic affinities with Jats, Rajputs, Ahirs and belongs to one ethnic group<sup>49,50</sup>. Gujjars are widely spread over Jammu-Kashmir, Punjab, Chandigarh, Haryana, Himachal Pradesh, Rajasthan, Gujarat, Madhya Pradesh, Uttar Pradesh, Uttaranchal, and Delhi<sup>36,51,52</sup>. Muslim Gujjars are the prominent tribe in Pakistan occupied Kashmir and Pakistan and contributes almost twenty percent of the country's entire population<sup>53</sup>. The Gujjar population size in India is expected to be around 1,073,000<sup>54</sup>.

## **Kamboj**

Kamboj or Kamboh are an ethnic group from Northwest India, which may relate to the ancient Kamboja of Iron Age India and mentioned repeatedly in ancient Sanskrit texts and epigraphs<sup>55-58</sup>. The earliest reference to the Kambojas are recorded in *Pāṇini's* work (5<sup>th</sup> century BCE). Later they were referred in *Manusmṛiti* (2<sup>nd</sup> century BCE) and the *Mahabharata* (1<sup>st</sup> century BCE), describing Kambojas as former Warrior kshatriyas who could not stand by Hindu sacred rituals<sup>59</sup>. The ancient Kambojas were supposed of Indo-Iranian origin<sup>56</sup>, however, they are also described as Indo-Aryans<sup>57,58,60</sup> or royal clan of the Sakas<sup>61</sup> time to time. The kingdom Kambojas territories were positioned beyond Pakistan, Gandhara, Afghanistan placing in Tajikistan, Uzbekistan, and Kyrgyzstan, and the *Edicts of Ashoka* (3<sup>rd</sup> century BCE) refers the Kamboja controlled territory an independent entity from the Mauryan empire in which it was located<sup>59</sup>. Clans of Kambojas together with Sakas, Pahlvas and the Yavanas, migrated from Central Asia during 2<sup>nd</sup> and 1<sup>st</sup> centuries BCE. They entered Afghanistan and India, setting up independent territories in Western and South-western India<sup>62,63</sup>.

In Punjab, Haryana and Rajasthan region of India, many Kamboj frequently use Kamboj as their surname in lieu of the sub-caste or the gotra name, while their Muslim counterparts in Pakistan mostly use Kamboh as the last name instead of gotra name. A sizable number of Muslim Kamboh are also found in doab of Uttar Pradesh, India. The total population size of Kamboj Hindu, Kamboj Sikhs, and Kamboj Muslims are 508000, 546000 and 30000 respectively in India (Joshua Report). Kamboj of Indian sub-continent are having an ethnic affinity with Khatri, Rajputs, Brahmins, Jats, Aryans, and others.

## **Khatri**

Khatri, a caste population in India and Pakistan, are mostly from the Punjab region. Additionally, they also live in Delhi, Uttar Pradesh, Madhya Pradesh, Himachal Pradesh, Chandigarh, Gujarat, Haryana, Rajasthan, Maharashtra and J & K. During the Mughal Empire, Khatri played a significant role in India's trans-regional trade<sup>64</sup>. Khatri have also been described among the "utmost vital merchant communities of early modern India"<sup>65</sup>. Khatri also claim Kshatriya status and regardless of individual ranking within the community, they believed themselves to be of pure Vedic stock and superior to Rajputs<sup>66</sup>. Although the Indian and the British authorities did not accept the Khatri claim of Kshatriya status since large number of mainstream Khatri were engaged in mercantile occupations<sup>67</sup>. Khatri of different regions follow different professions. Khatri claim that they were warriors who took to trade<sup>68</sup>. Historically, Khatri were formerly involved in the knitting of silk saris, and later some of them turned out to be merchants<sup>52</sup>. Khatri in India have a population size of 2,303,000 and follow mainly Hinduism and Sikhism<sup>69</sup>.

## Jat

Jat (also spelled as “Jatt” and “Jaat”) people are an ethnic agricultural group that has apparently settled in Northwest South Asia for several thousand years<sup>70</sup>. The term Jat is supposedly derived from Jatta, a broad word used for cattle gazers and camel breeders, moving in a group – jatha. Jats have been known as zamindars (landowner) since the period of Mogul emperor Akbar in 16<sup>th</sup> century<sup>71</sup>.

Jat have been identified as related to the Indo-Scythians that entered India between 200 BC and 600 AD<sup>41</sup>. Greek historians *Pliny* and *Ptolemy* suggested the movement of the Jat people from the banks of Oxus river to India around a century before Christ. They spoke Indo-Aryan languages and considered to be amongst the oldest ancient people of India, who settled in the fertile plains of Punjab along the Indus River turning into a pastoral and farmer community<sup>71</sup>, few scholars believed Jat related to the Rajput tribes<sup>50,72</sup>.

Jat largely belong to three main religious faiths, Hindu, Muslim, Sikhs and mostly are inhabited in Indian states of Haryana, Punjab, Delhi, Rajasthan, Uttar Pradesh and also Punjab, Sindh provinces of Pakistan<sup>70,71,73</sup>. the people in India were numbered to be around 82.5 million in 2012 and are classified as OBCs (other backward castes) in some states of India though, though only the Rajasthani Jats are entitled to OBC category by the central government of India<sup>74</sup>.

# Supplementary Figures

**Figure S1. Principal Component Analysis (PCA) using haplogroup frequencies in South Asians, Iranians and Central Asians (A) mtDNA PC plot and (B) Y-chromosome PC plot triangle indicate new samples from Northwest Indian (NWI) and Gujjar\_NW refers to the new Gujjar sampled from NWI.**

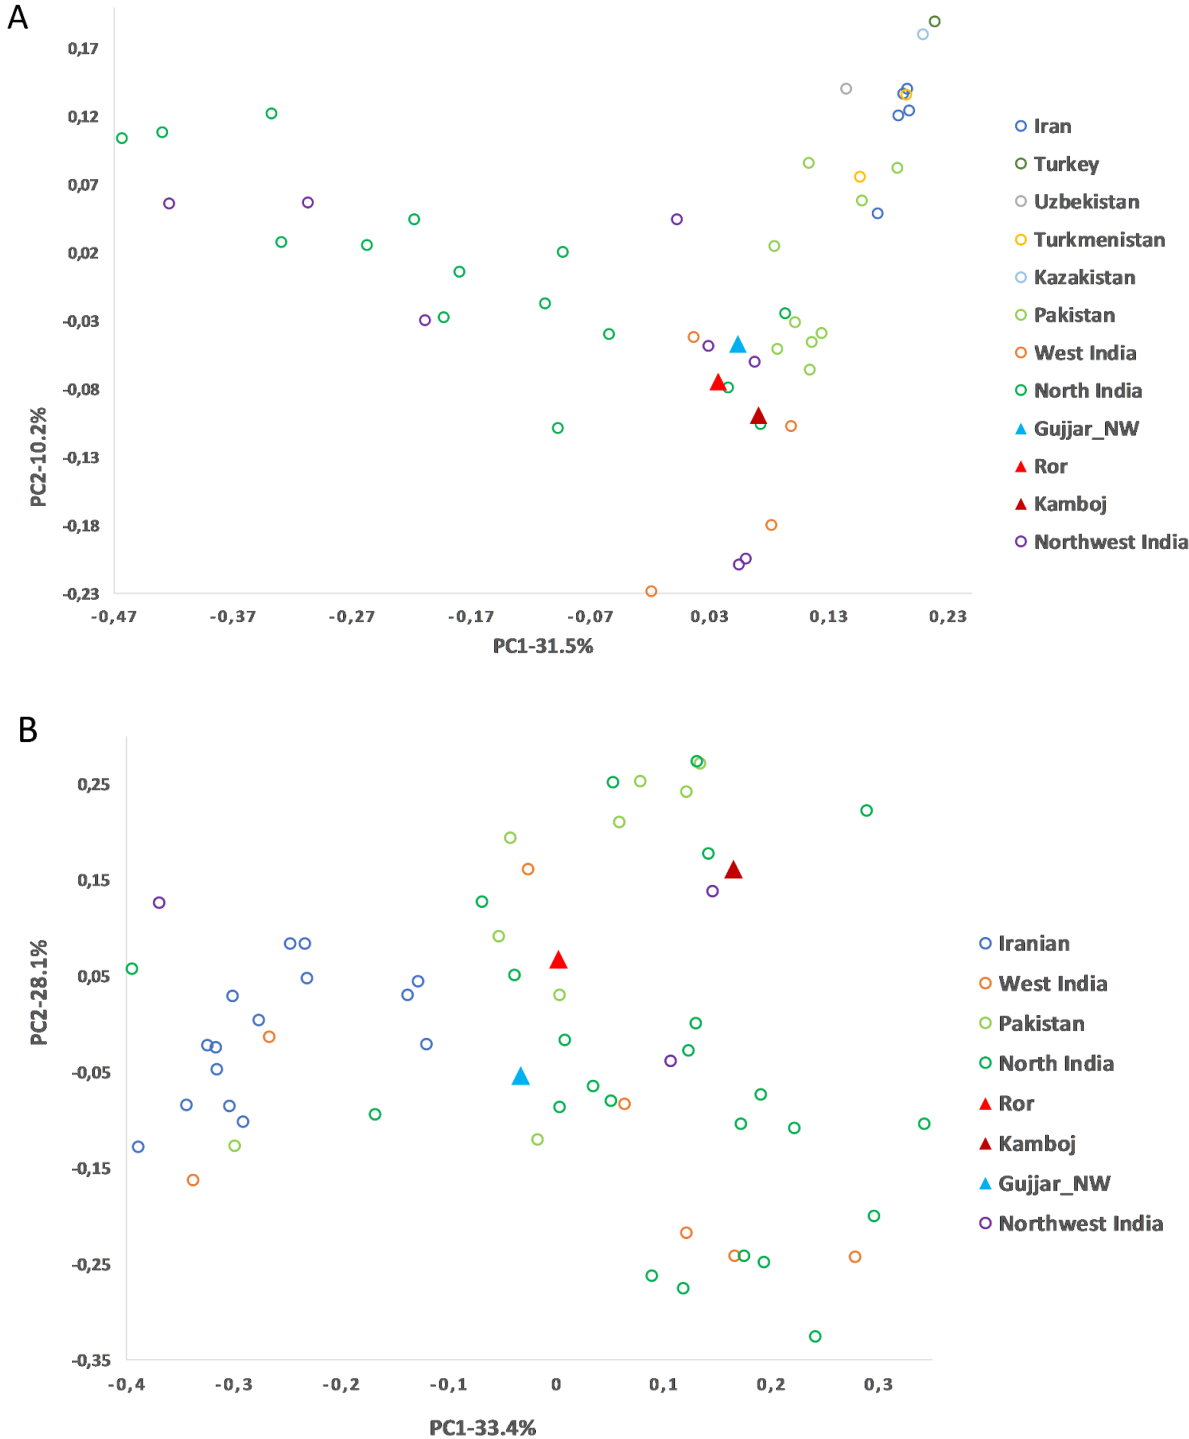





**Figure S3. Genetic structure of PNWI in context of ancient DNA: (A) PC plot for modern Eurasians with a subset of ancient sources from Steppe, Iran, Anatolia, Central Asia, and South Asia, and (B) PC plot for modern South Asians with a subset of ancient sources.**

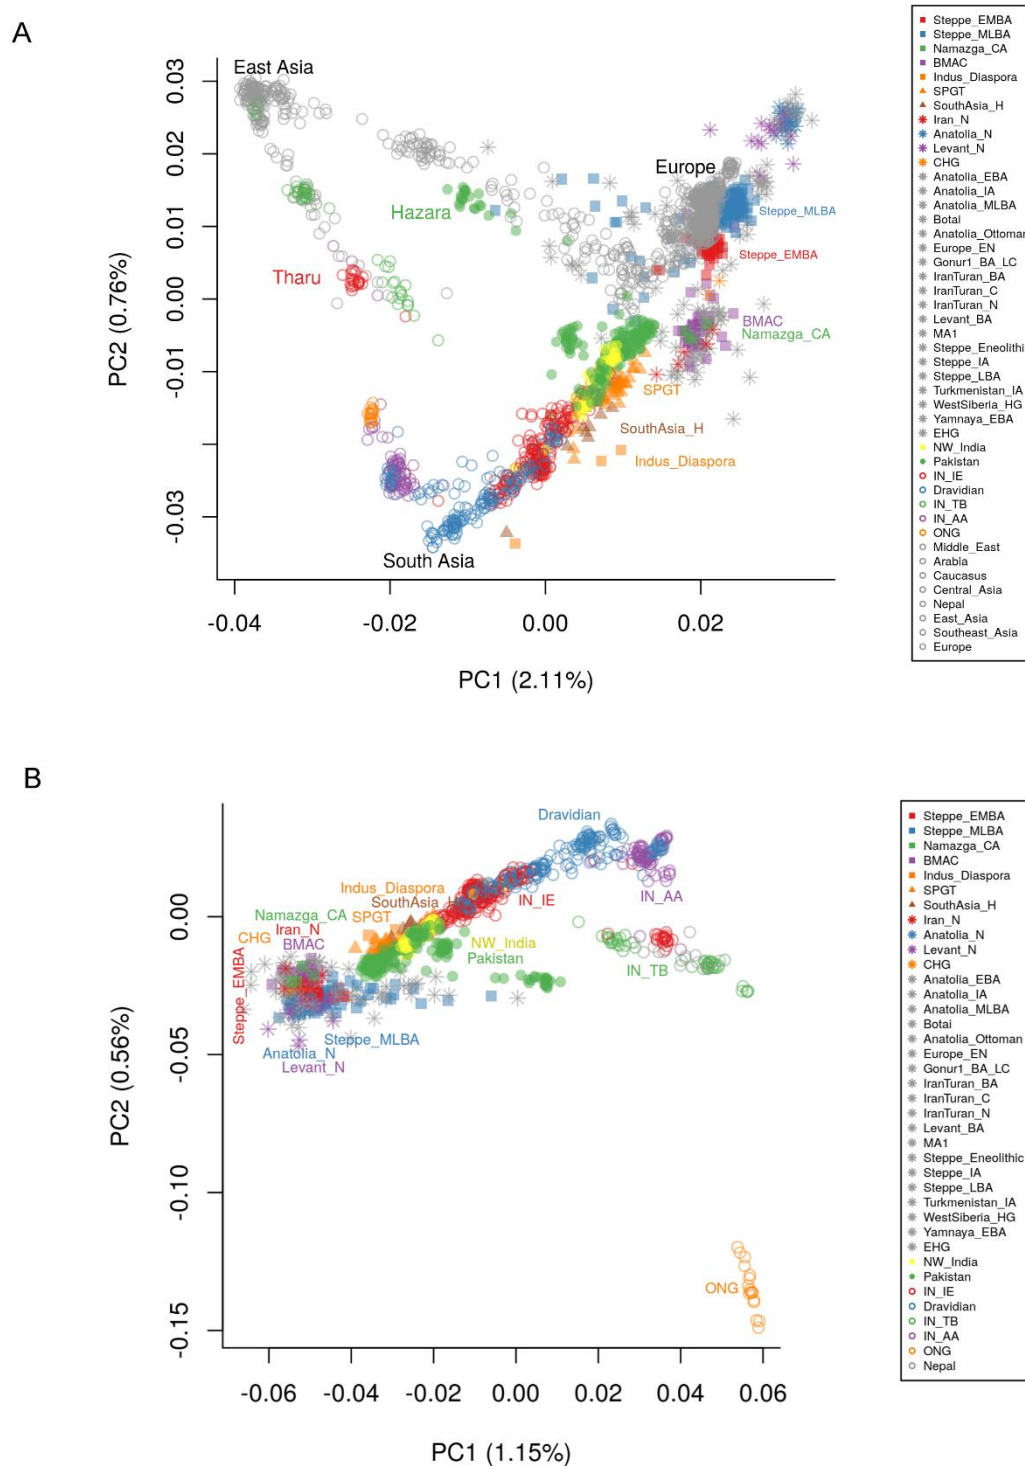

**Figure S4. Cross-Validation for ADMIXTURE run plot** showing cross-validation (CV) indexes of all runs of the Admixture analysis.

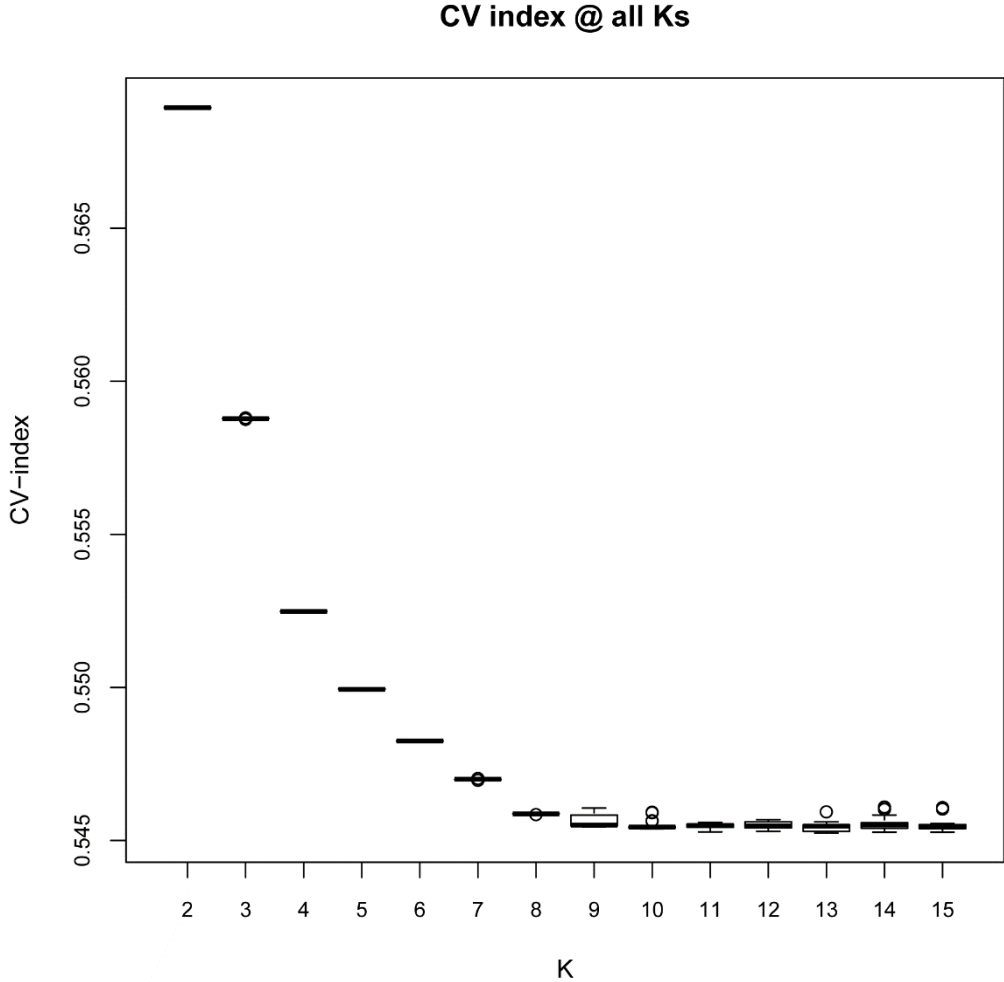

**Figure S5. Derived allele sharing between modern PNWI and Eurasian groups (A) and (B) plots of derived allele sharing obtained for PNWI and Indian Gujaratis using Outgroup  $f_3$  (NWI/Pakistan/Gujaratis, X; Yoruba) test, where X is any other modern Eurasian population. Error bars represent jack-knife standard errors.**

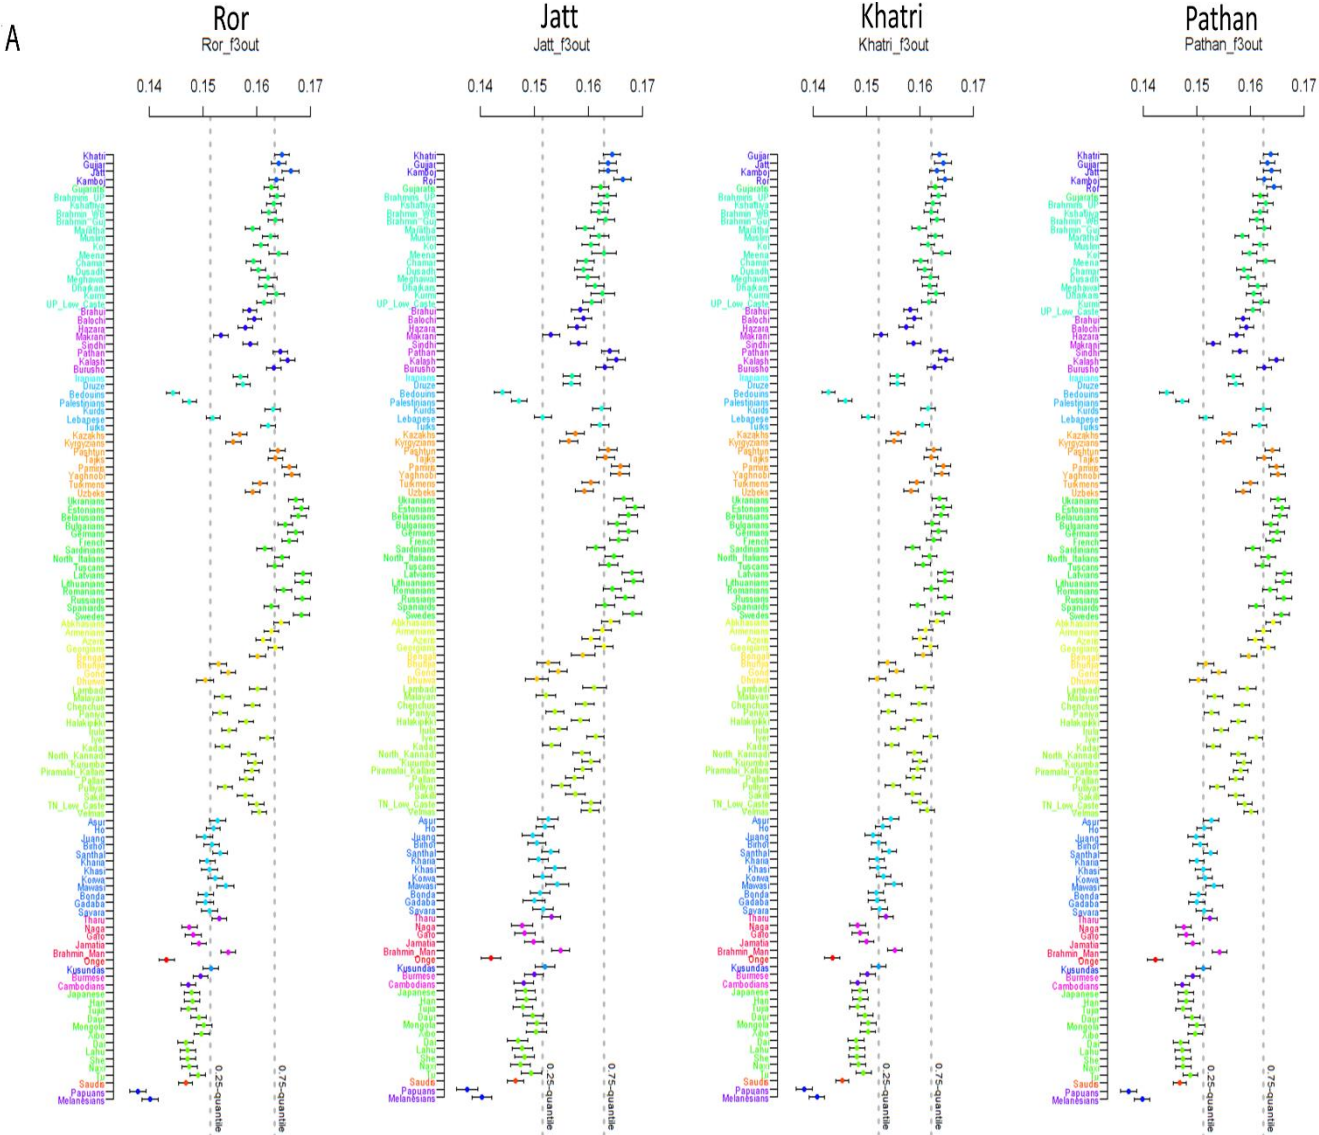

B

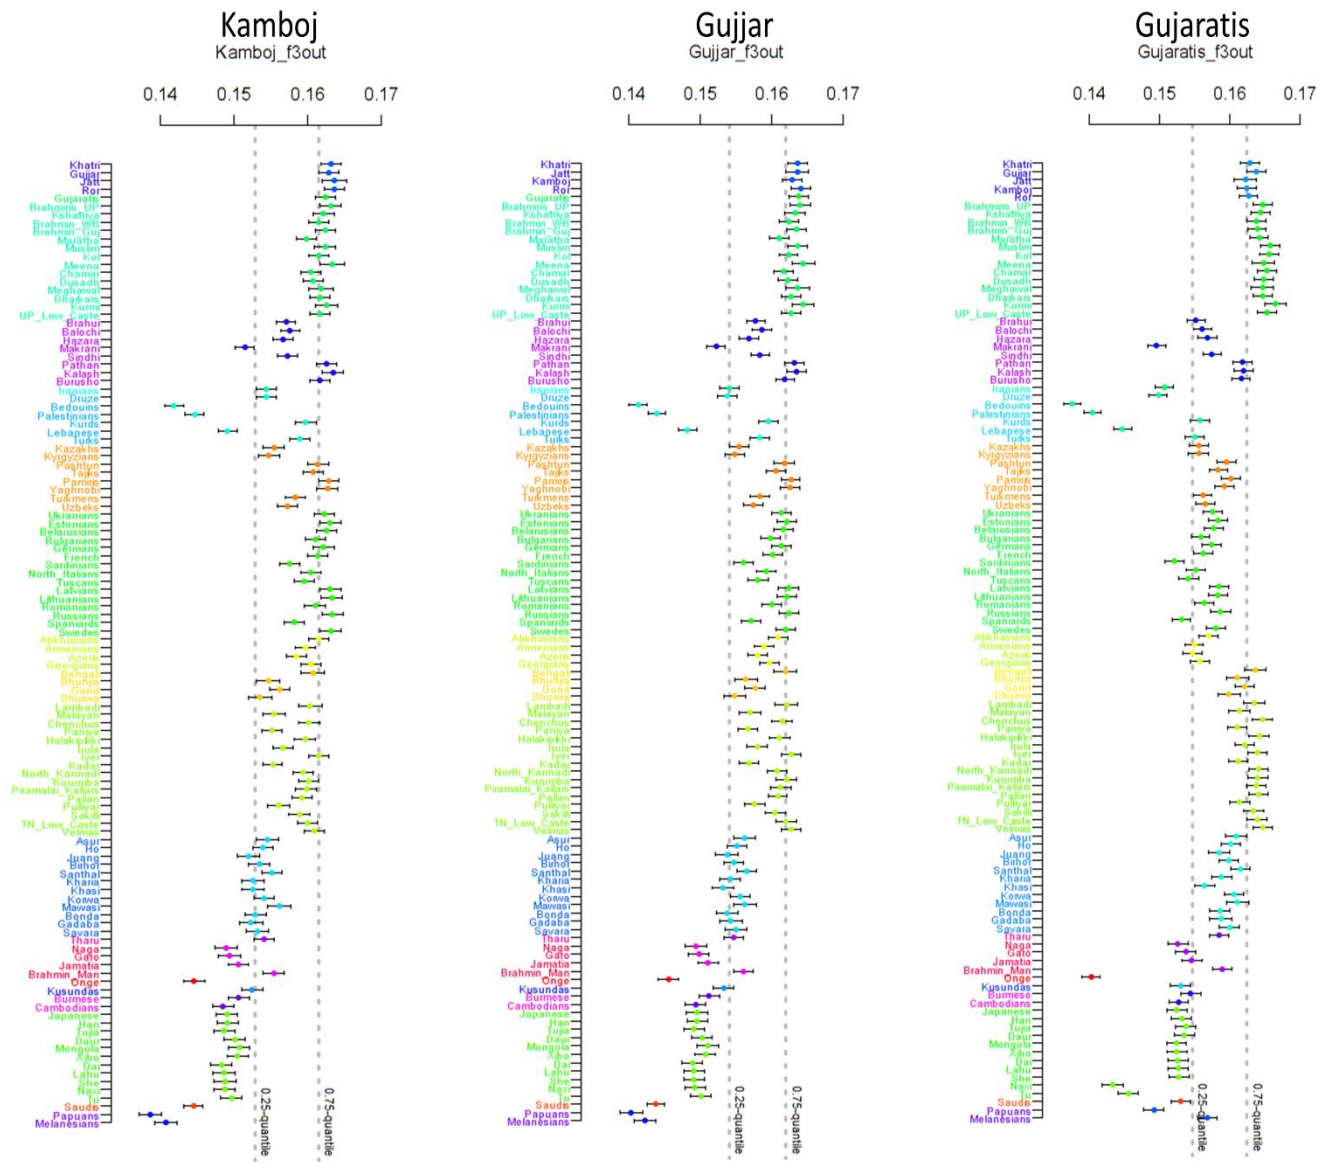

**Figure S6. Comparing Outgroup  $f_3$  for PNWI groups with ancient sources**  
**(A) Steppe\_EMBA vs Iran\_N scatter plot** of Outgroup  $f_3$  (Iran\_N, X; Yoruba) on x-axis vs Outgroup  $f_3$  (Steppe\_EMBA, X; Yoruba as outgroup) on y-axis indicating the distinct pattern of PNWI in their affinity to Steppe highlighting Ror and Jat the closest ones, **(B) Steppe\_EMBA vs EHG scatter plot** of Outgroup  $f_3$  (EHG, X; Yoruba) on x-axis vs Outgroup  $f_3$  (Steppe\_EMBA, X; Yoruba as Outgroup) on y-axis indicating the distinct pattern for PNWI and Ror (and Jat) in their higher affinity to Steppe and EHG than other Indian and **(C) Anatolia\_N vs Iran\_N scatter plot** of Outgroup  $f_3$  (Iran\_N, X; Yoruba) on x-axis vs Outgroup  $f_3$  (Anatolia\_N, X; Yoruba) highlighting Ror as the only group in their relative higher affinity to Neolithic Anatolian than that of other South Asians. Here X refers to different West Eurasian and South Asian populations. Steppe\_EMBA, Early and Bronze Age Steppe; Iran\_N, Iran\_Neolithic; EHG, Eastern Hunter Gatherer; Anatolia\_N, Anatolia\_Neolithic. Error bars represent jack-knife standard errors.

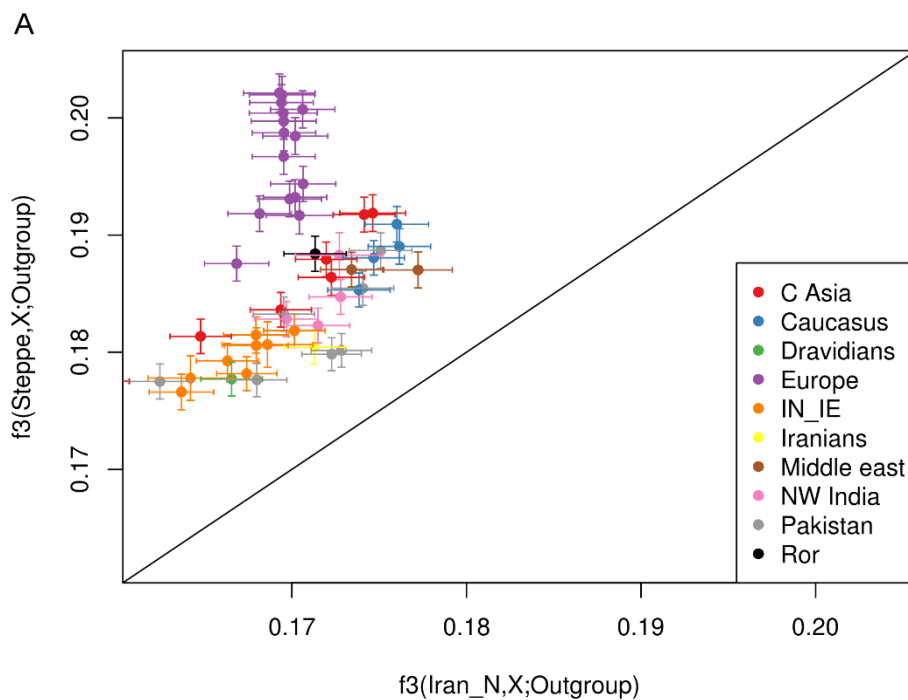

B

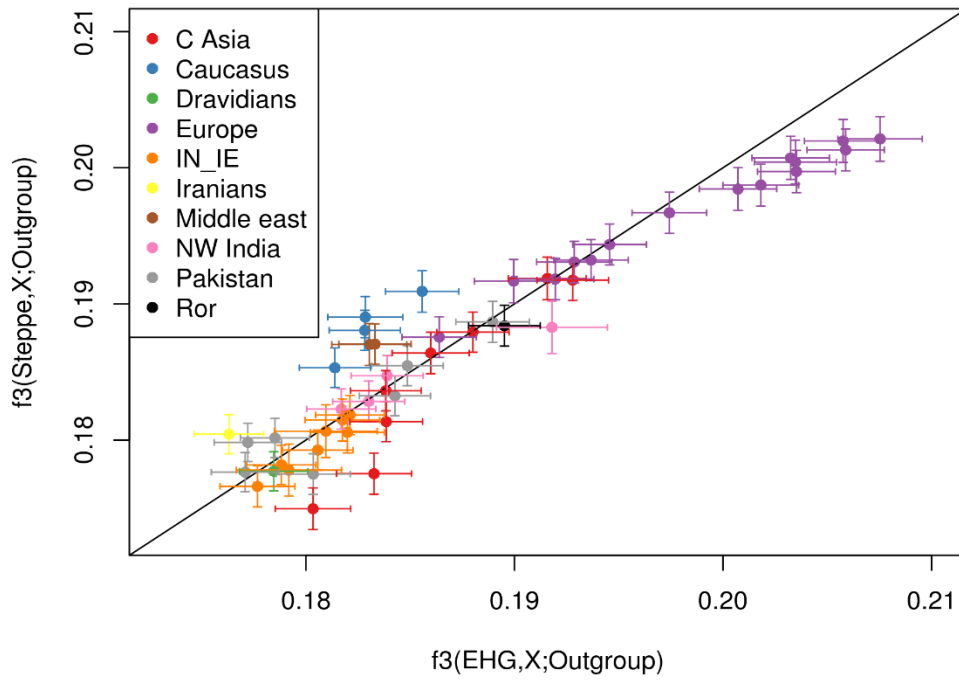

C

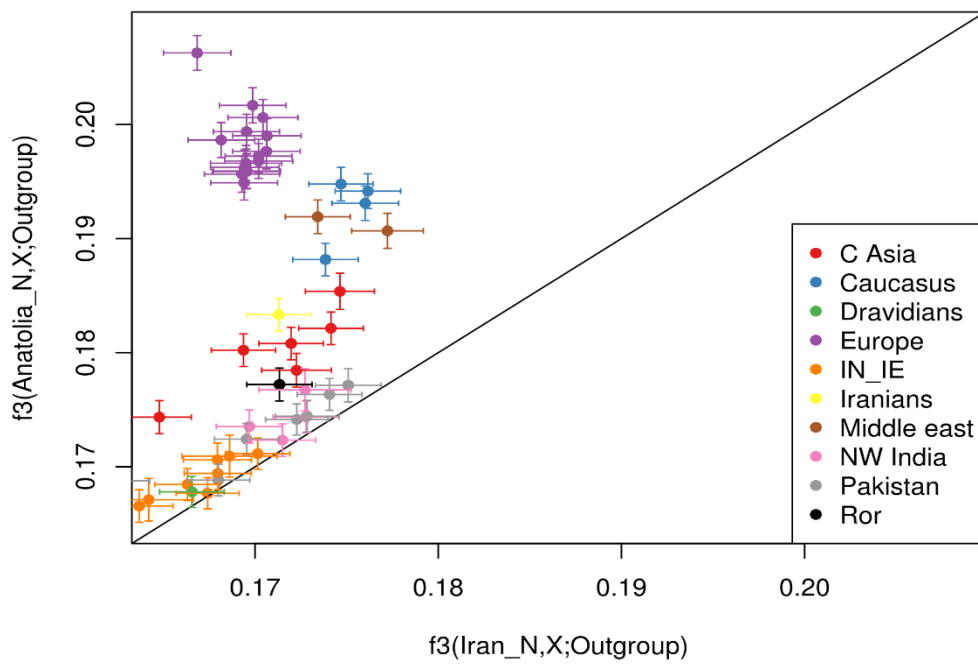

**Figure S7. Outgroup  $f_3$  for South Asians and West Eurasians with ancient sources (A) EHG, (B) Anatolia\_N, (C) Iran\_N and (D) Steppe\_EMBA** Derived allele sharing obtained by Outgroup  $f_3$  (Ancient Sources, X; Yoruba) test, where Ancient sources are EHG/Anatolia\_N/Iran\_N/Steppe\_EMBA and X is any population from South Asia and West Eurasia. Error bars represent jack-knife standard errors.

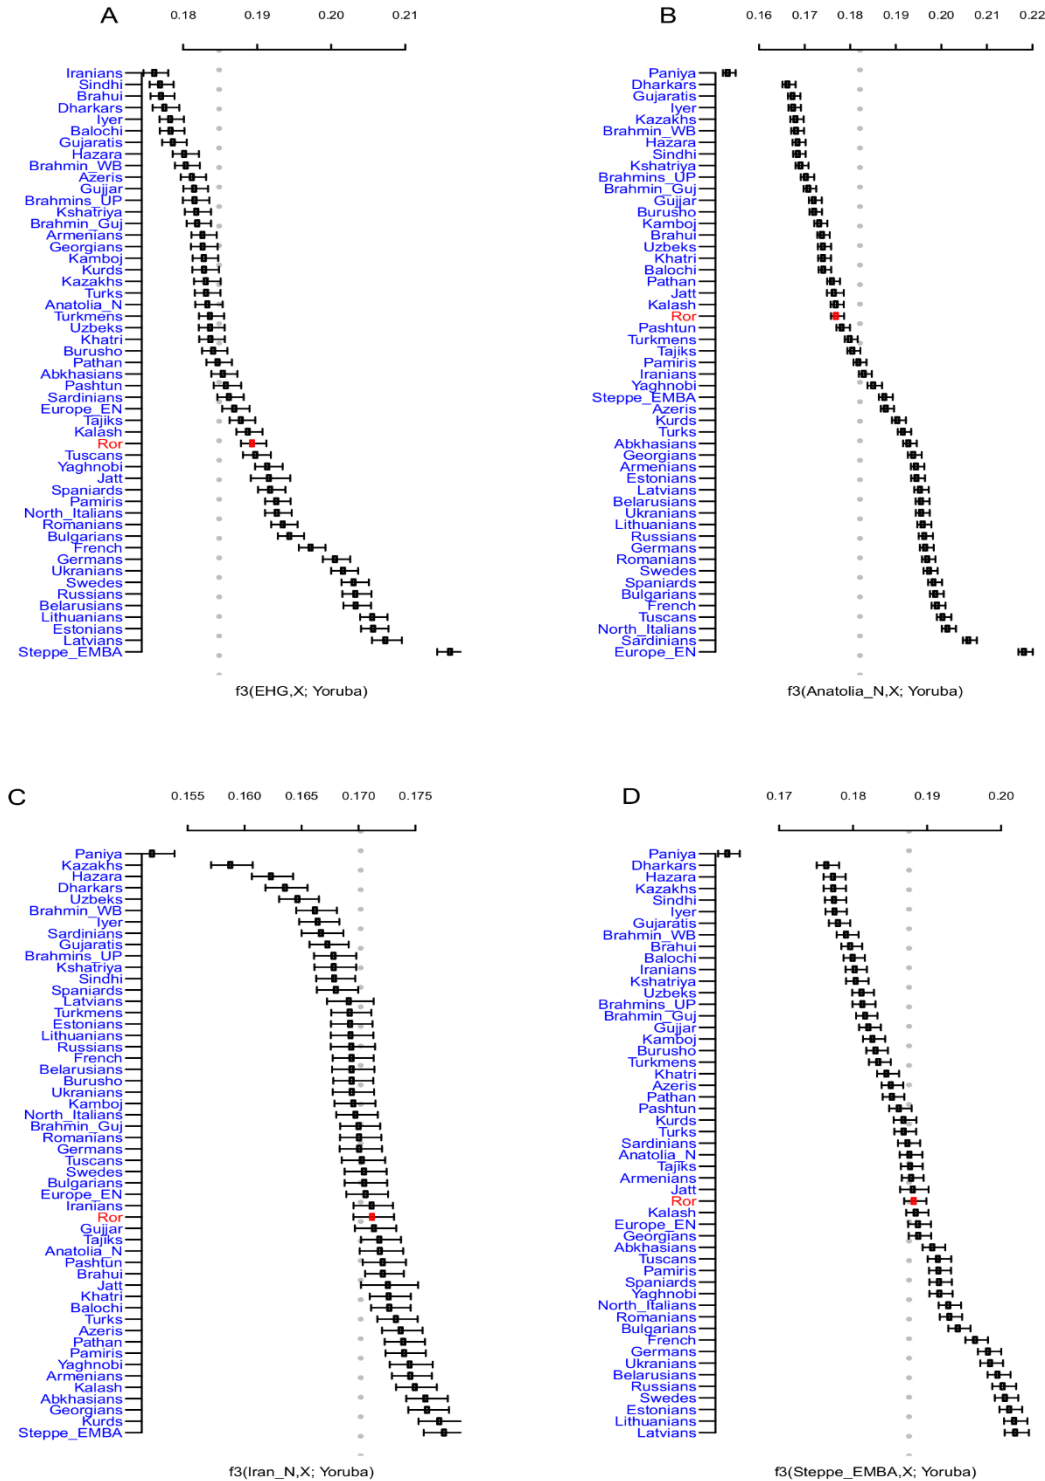



**Figure S8. D statistics of South Asians with distant ancient sources (A) EHG vs Steppe\_EMBA scatter plot** comparing  $D(X, \text{Ror}; \text{EHG}, \text{Yoruba})$  vs  $D(X, \text{Ror}; \text{Steppe\_EMBA}, \text{Yoruba})$ , where X is a South Asian/West Eurasian, showing distinct affinity-based clustering of PNWI, striking out Ror and Jat in their highest allele sharing to EHG than Steppe\_EMBA (or Yamnaya) in South Asia, **(B) Anatolia\_N vs Iran\_N scatter plot** comparing  $D(X, \text{Ror}; \text{Anatolia\_N}, \text{Yoruba})$  vs  $D(X, \text{Ror}; \text{Iran\_N}, \text{Yoruba})$  where X is a South Asian/West Eurasian, showing distinct affinity-based clustering of PNWI highlighting Ror in their highest allele sharing to Anatolia\_N than Iran\_N, in South Asia, **(C) D stat with CHG**  $D(X, \text{Ror}; \text{CHG}, \text{Yoruba})$  reports distinct affinity of PNWI to CHG, Ror and Jat are the closest to CHG among South Asians, **(D) D stat with EHG**  $D(X, \text{modern Iran}; \text{EHG}, \text{Yoruba})$  indicate the relative allele sharing of West Eurasians and South Asians to EHG when compared to modern Iranians. ME, Middle East; E Asia, East Asia; IN\_IE, Indian Indo-European; NW and NW India, Northwest India; SE Asia, South East Asia; TB, Tibeto-Burman; Pak, Pakistan. Error bars represent jack-knife standard errors.

A

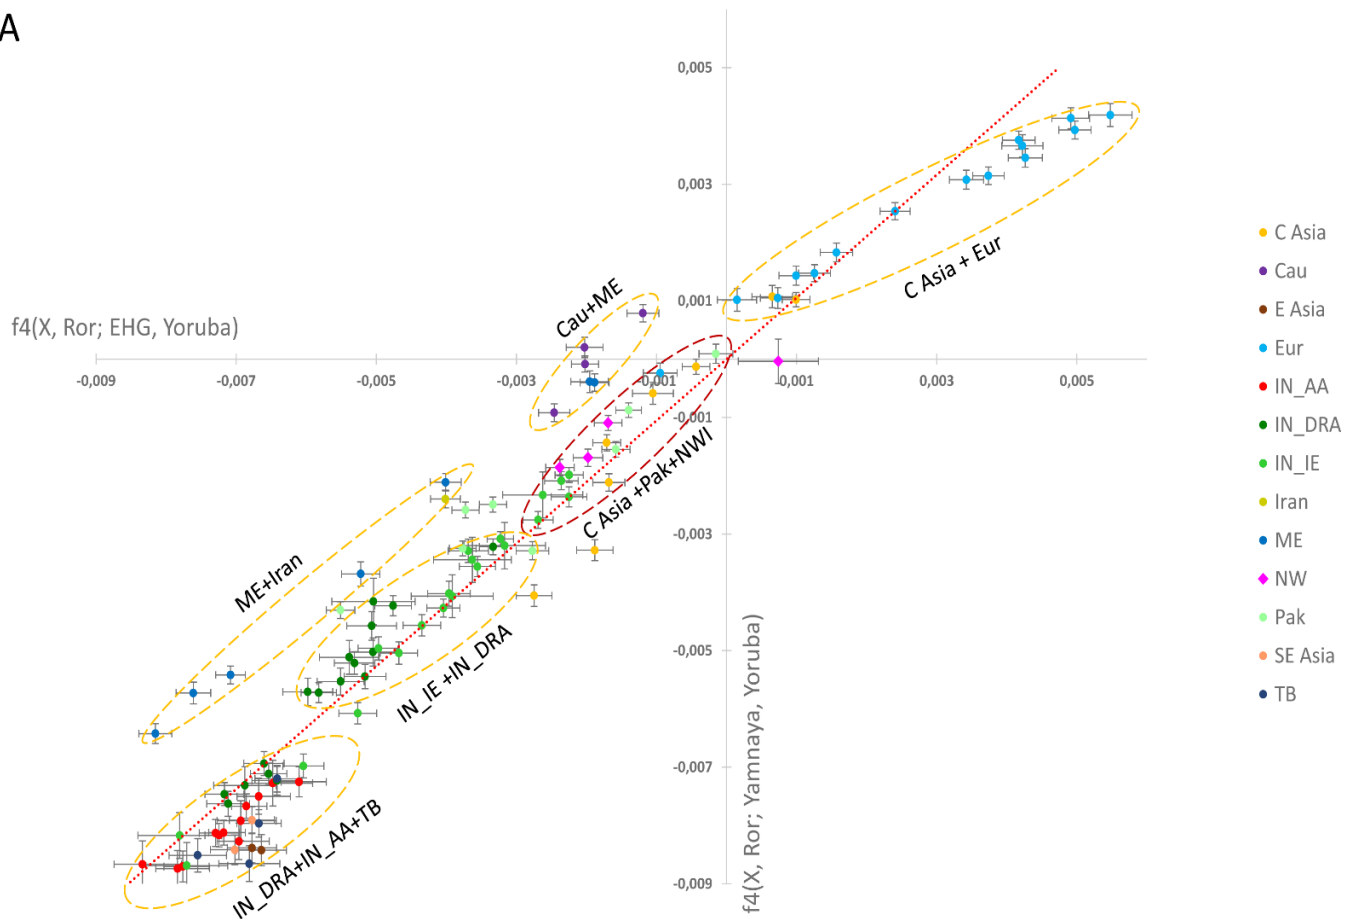

B

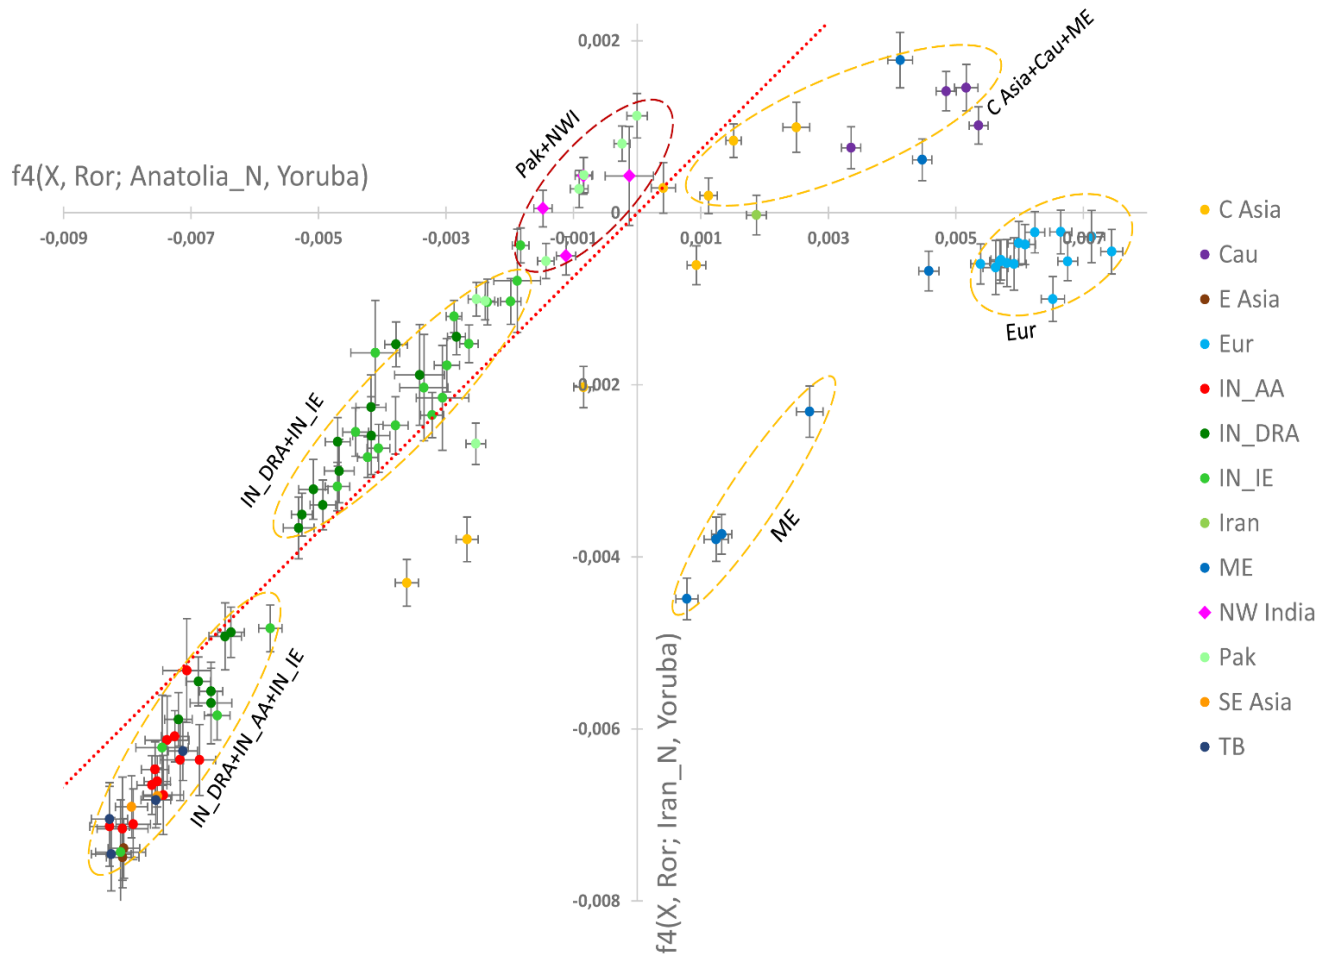

C

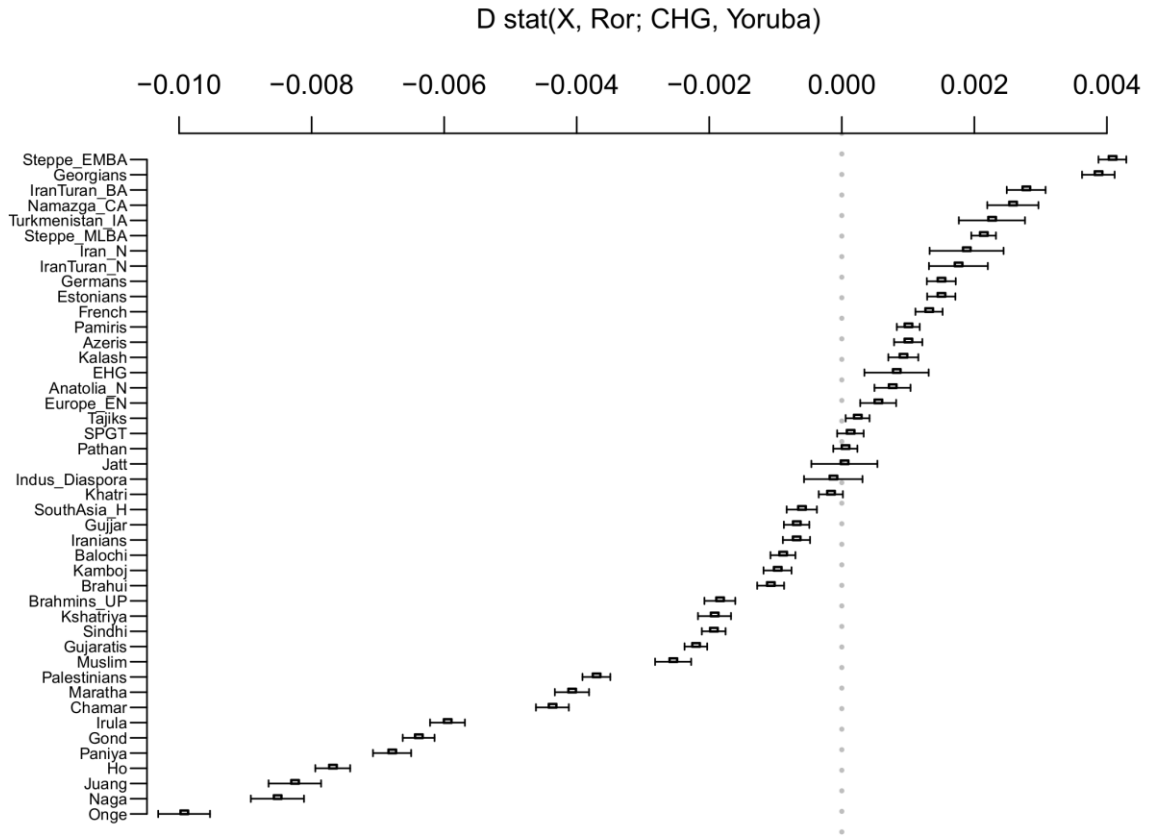

D

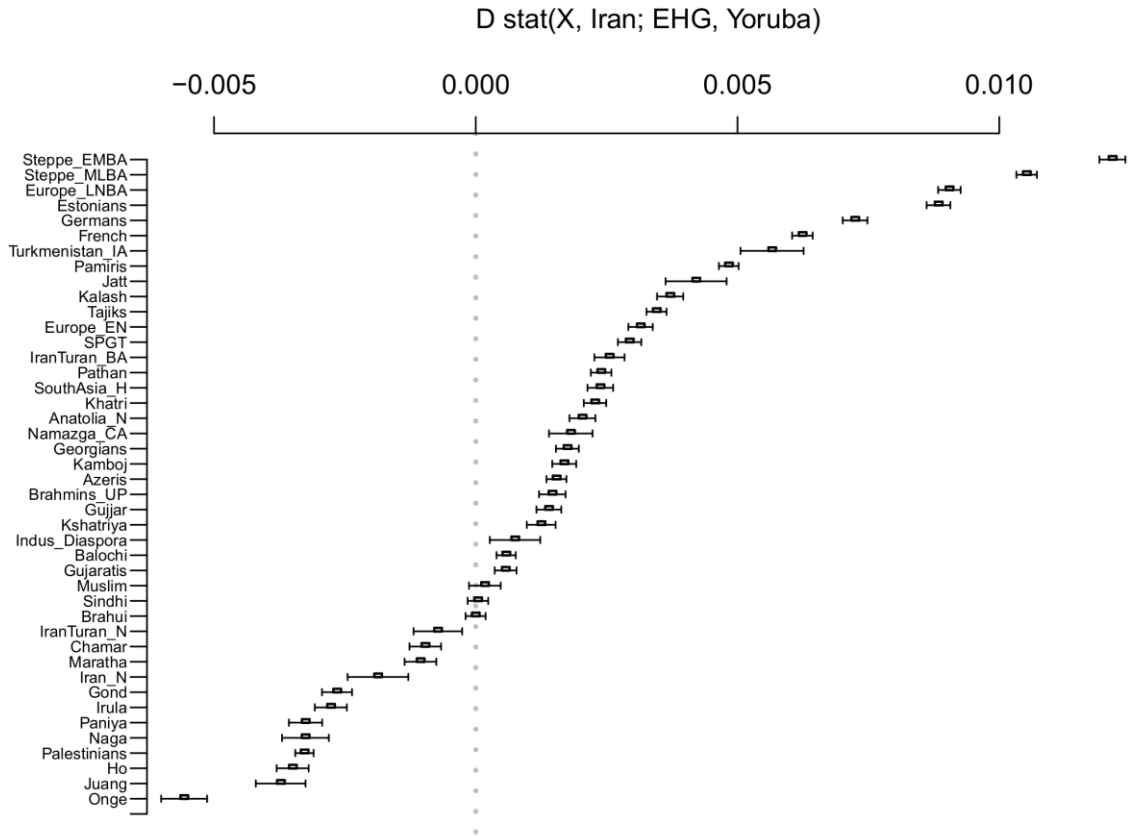

**Figure S9. *D* statistics comparing allele sharing of South Asians with proximal ancient sources.** We used *D* stat in form  $D(X, Ror; aDNA, Yoruba)$  where Yoruba  $X$  is a modern South Asian/West Eurasian/ancient group,  $aDNA$  is any of Steppe\_MLBA/Namazga\_CA/SPGT/Indus\_Periphery/SouthAsia\_H **(A) *D* stat with Steppe\_MLBA** shows distinct affinity of NWI to Steppe\_MLBA, highlighting Ror the closest to Steppe\_MLBA among South Asians, **(B) *D* stat with Namazga\_CA** showing equivalent affinity of NWI to Namazga\_CA, striking out Kalash in their highest allele sharing to Namazga\_CA than others, **(C) *D* stat with SPGT** showing distinct affinity of NWI to SPGT, striking out Ror and Kalash in their highest allele sharing to SPGT than any other South Asians, **(D) *D* stat with Indus\_Periphery (Indus\_Diaspora)** showing equivalent affinity of all NWI populations to Indus\_Periphery, **(E) *D* stat with SouthAsia\_H** showing distinct affinity of NWI to SouthAsia\_H, striking out Ror and Kalash in their highest allele sharing than other South Asians. Used acronyms: Steppe\_MLBA, Middle to Late Bronze Age Steppe; Namazga\_CA, Chalcolithic Namazga; Indus\_Diaspora, Indus\_Periphery; SPGT, Iron Age to pre-historical South Asia; SouthAsia\_H, Early historical South Asia; BMAC, Bactria Margiana Complex; Turkmenistan\_IA, Iron Age Turkmenistan; IranTuran\_N, Neolithic IranTuran; IranTuran\_BA, Bronze Age IranTuran. Error bars represent jack-knife standard errors.

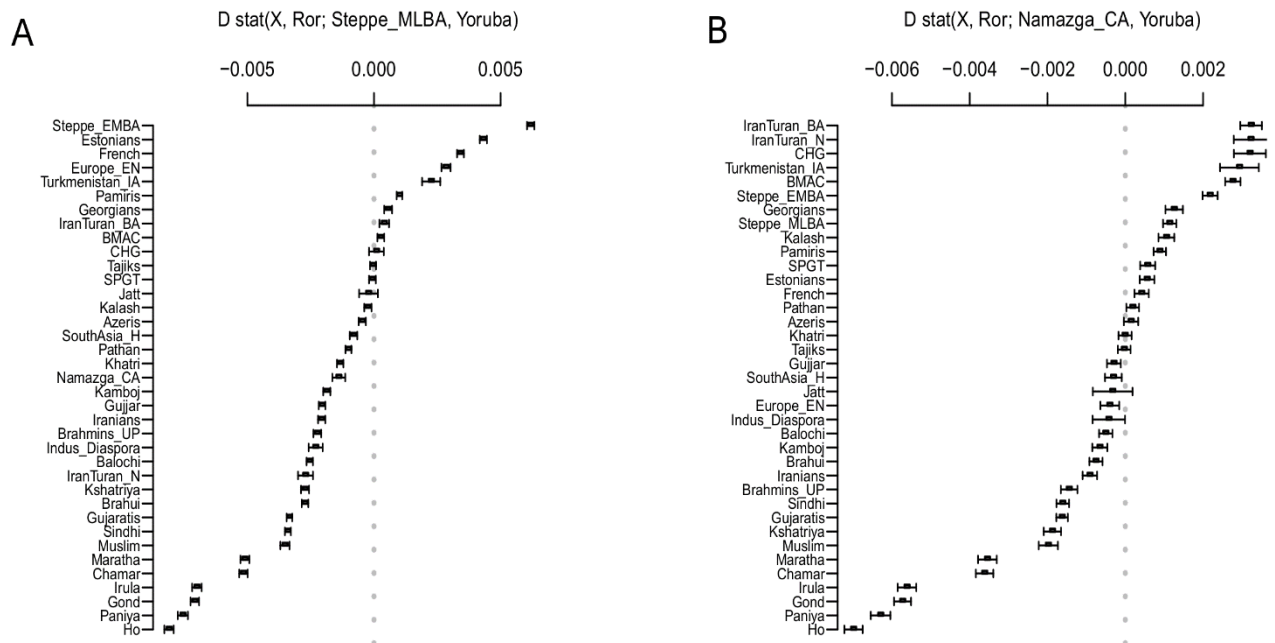

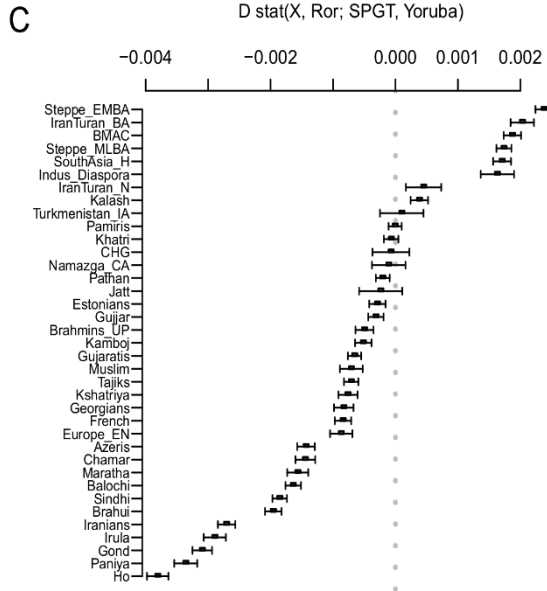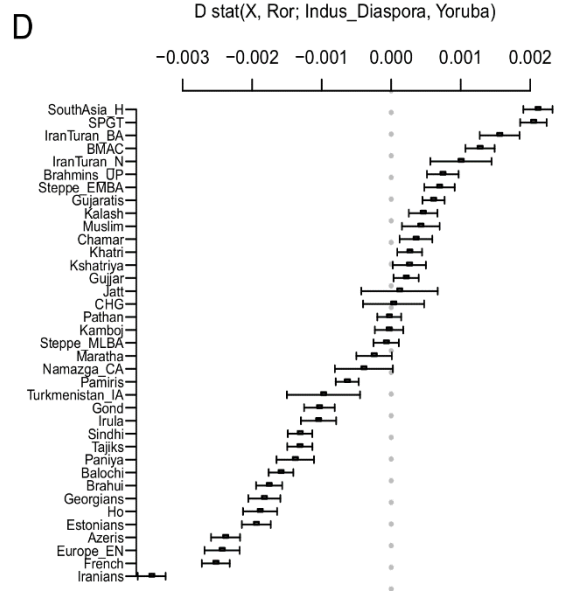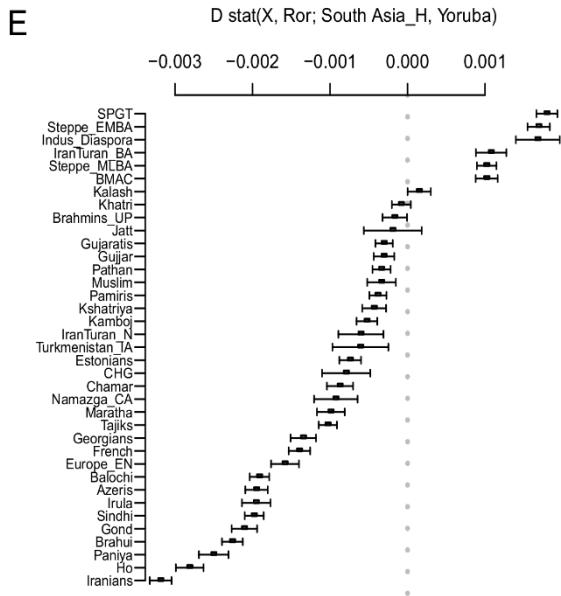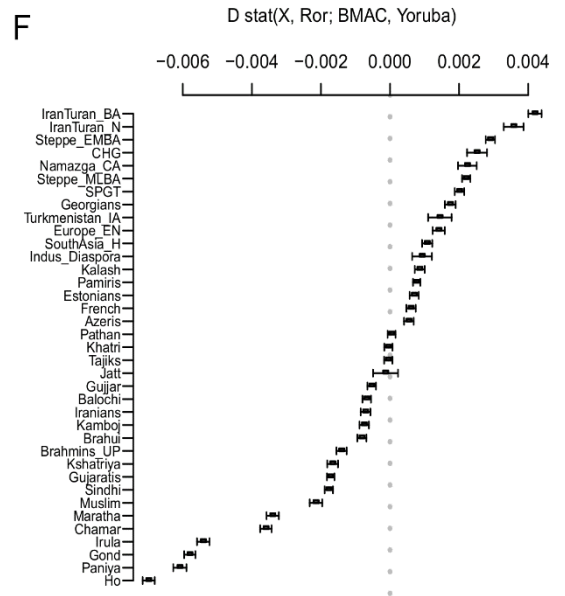

**Figure S10. LD Decay Curve for ALDER run (A) and (B) Ror weighted admixture LD Decay curve for best representative ALDER results for Ror, (C) Kamboj weighted admixture LD Decay curve for best representative ALDER results for Kamboj, (D) Gujjar weighted admixture LD Decay curve for best representative ALDER results for Gujjar.**

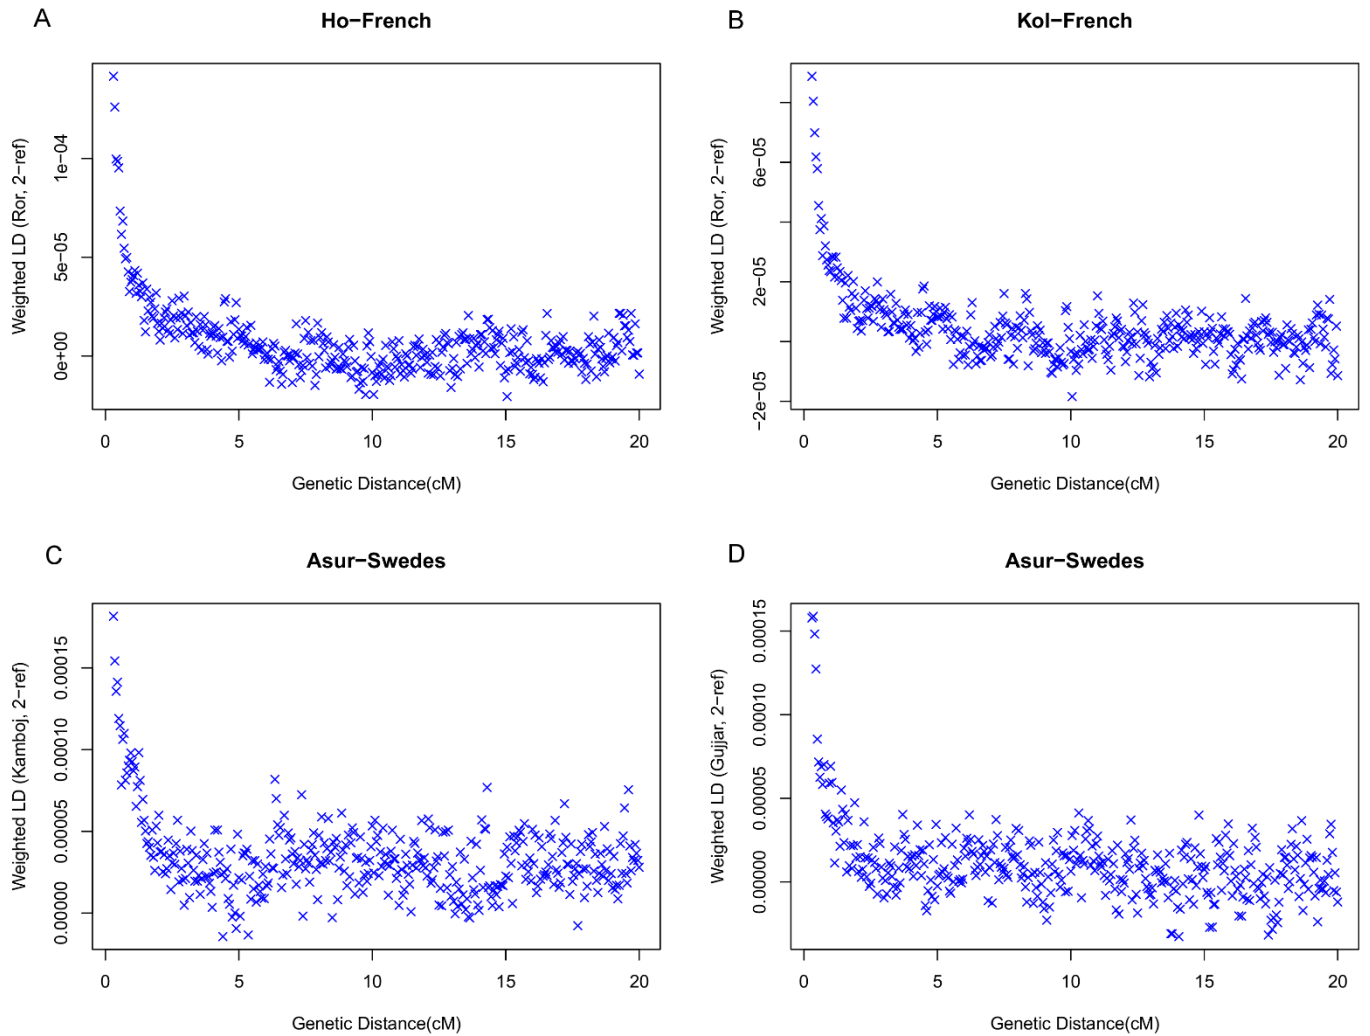

**Figure S11. Maximum Likelihood tree of *TreeMix* relationship of Northwest Indian groups with neighboring Pakistani and other Eurasians inferred by *TreeMix* showing Ror and Kalash in the same clade.**

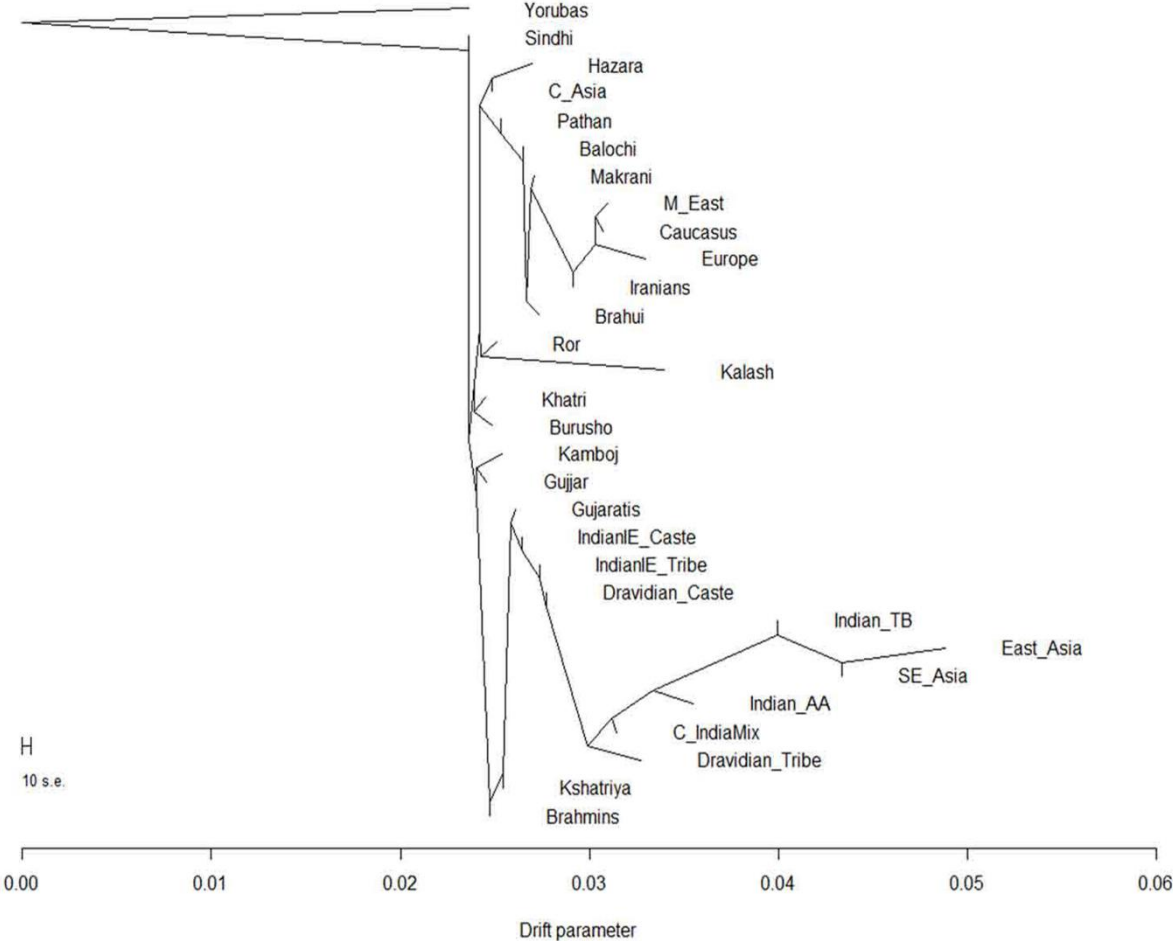

**Figure S12. Runs of Homozygosity suggesting high density and population size for Ror** the plot of Runs of Homozygosity (RoH) for Northwest Indians and other South Asians comparing the average length of RoH amongst them, using three different windows of 1000, 2500 and 5000 kb.

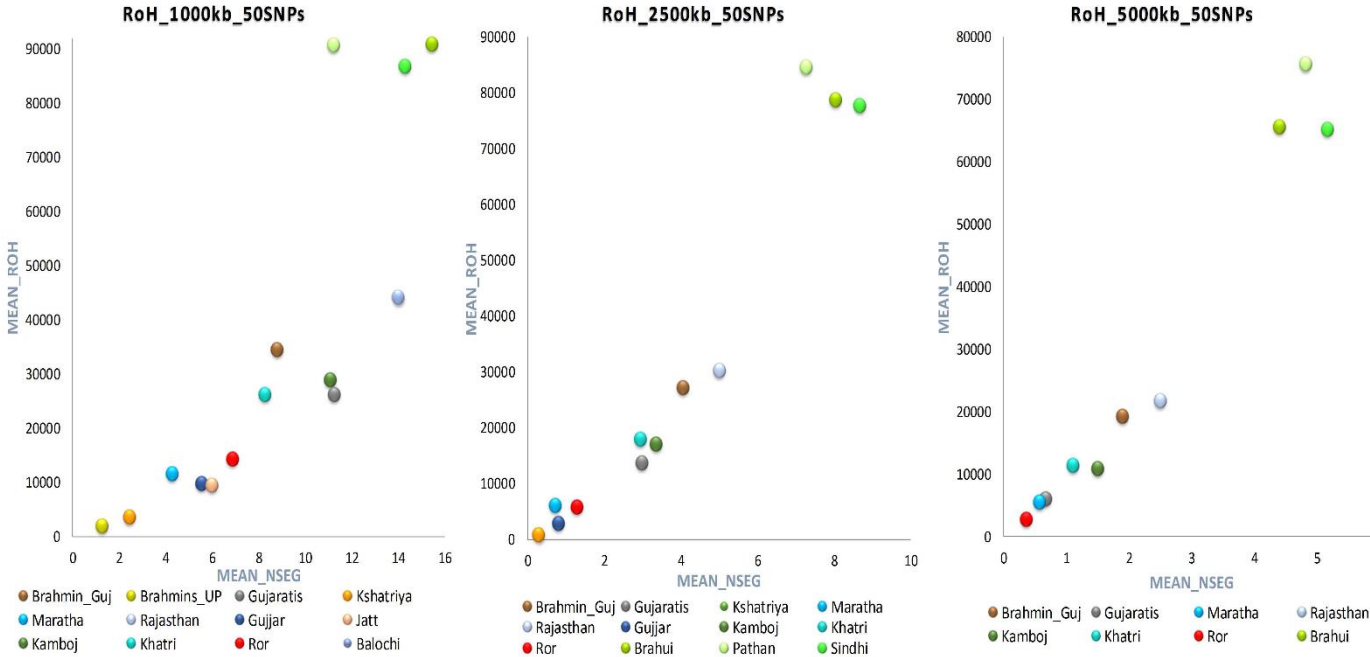



**Figure S13. Mean Chunk received by PNWI and NI\_IE (A) Chunks received from across Eurasia number of average Chunks received by PNWI and adjoining Gujaratis from across Eurasia and (B) Chunks shared among PNWI individuals number of average Chunks shared among PNWI and Gujarati is shown on the right.**

A

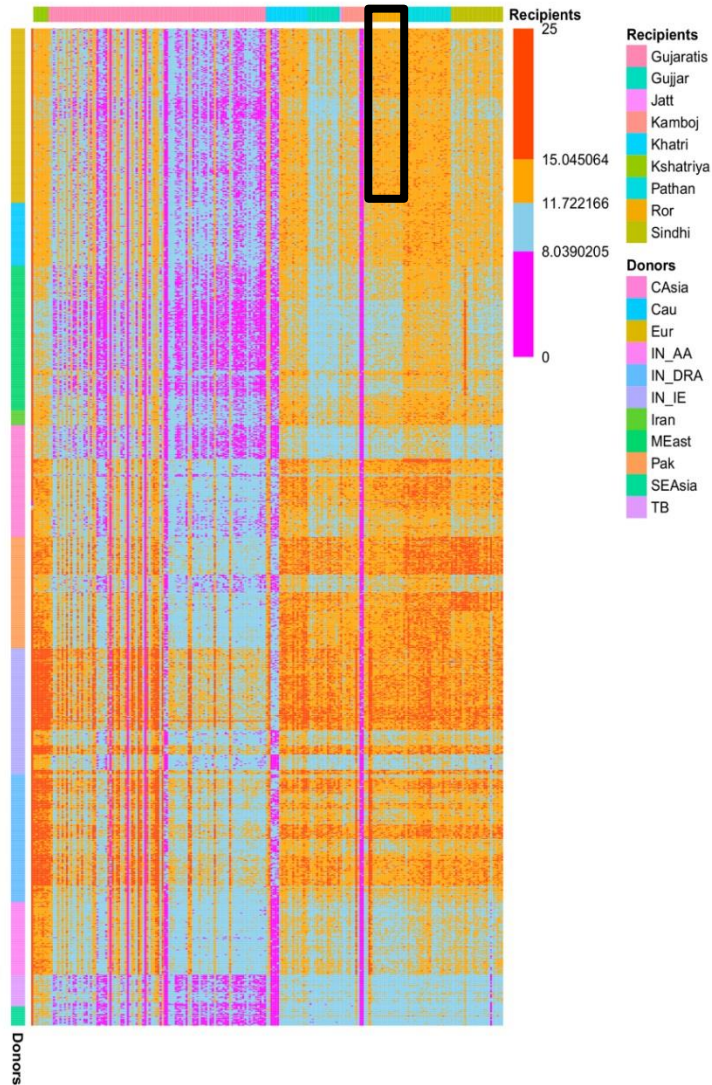

B

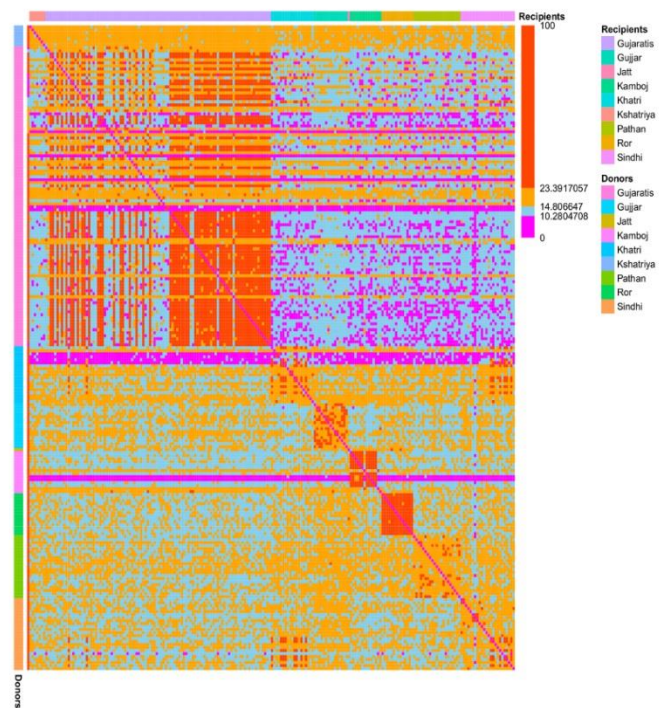

**Figure S14. NNLS based Ancestry estimated for PNWI and neighboring populations (A) All populations as donor population-based ancestry estimates for PNWI and neighboring groups from North Indian Gangetic Plain inferred by CHROMOPAINTER using NNLS-based analysis including all populations as donor. and (B) UNLINKED model** Ancestry estimates for PNWI and neighboring groups from North Indian Gangetic Plain inferred by UNLINKED CHROMOPAINTER run using NNLS-based analysis removing PNWI groups from donors. IN\_IE, Indo-Europeans from India; Pak, Pakistan; Eur, Europe; M East, Middle East; Cau, Caucasus; IN\_DRA, Indian Dravidians.

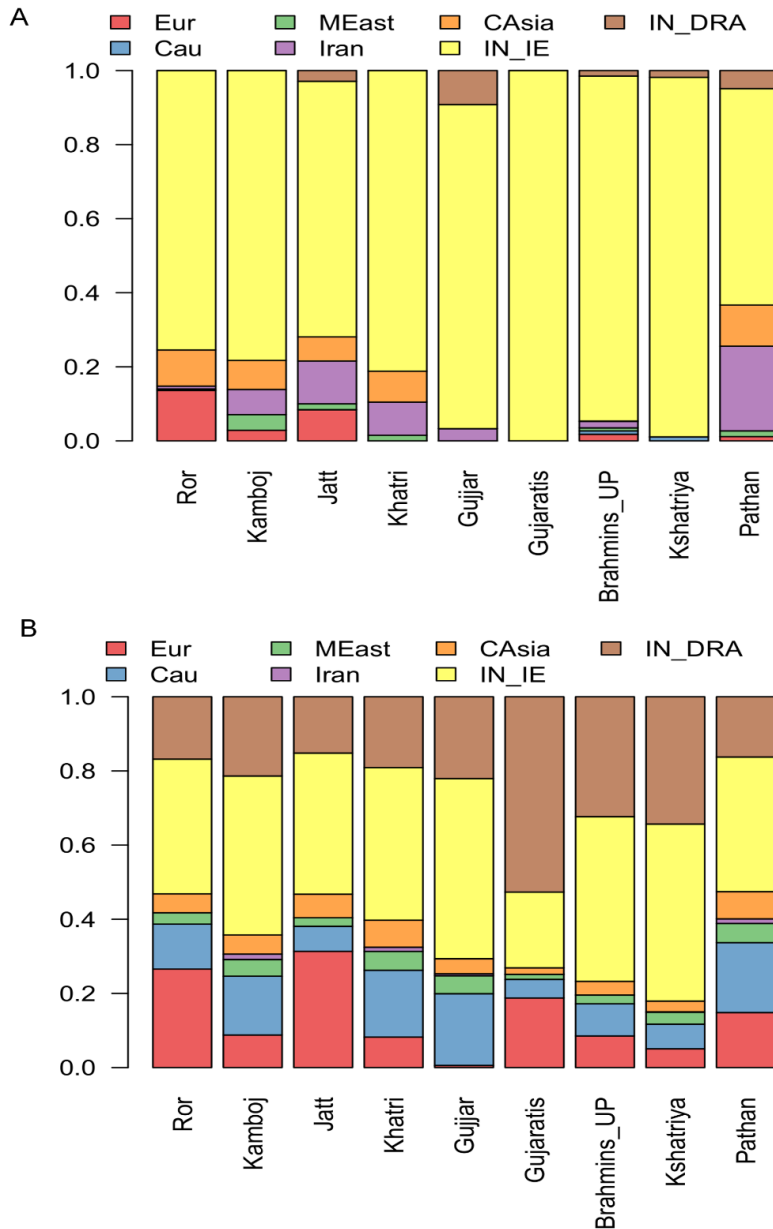

**Figure S15. Correlation of IBD sharing of Ror with Steppe Ancestry in Europeans** the scatter plot for correlation using “Pearson” method indicating the higher number of IBD segment shared between Ror and Europeans is positively correlated with the increasing Steppe ancestry in modern Europeans. Gray shade shows the 95% Confidence Interval.

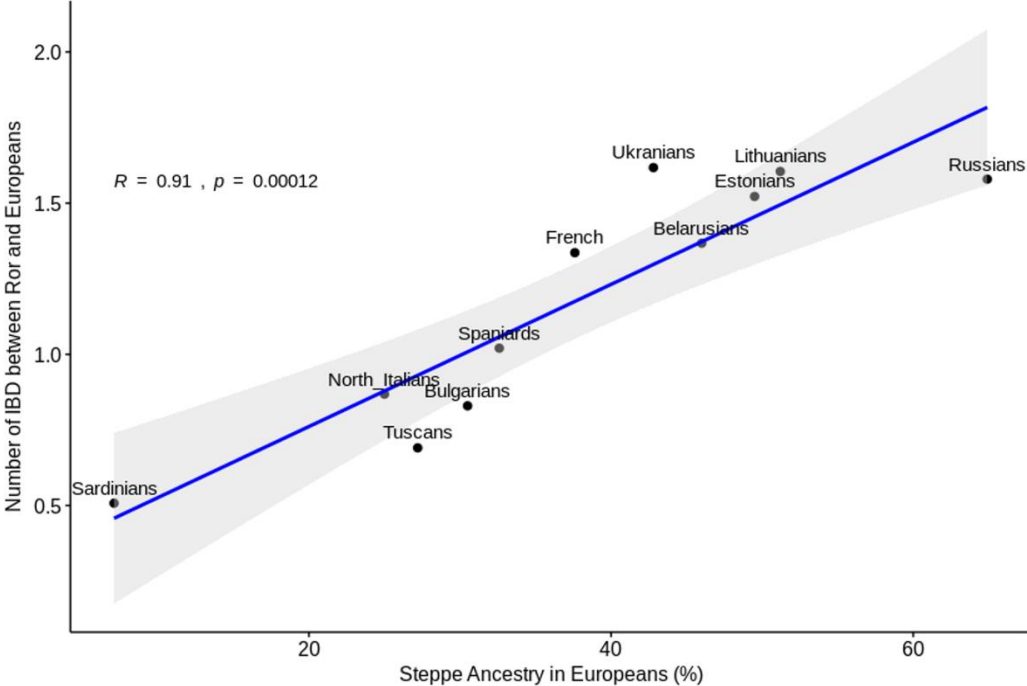

## Supplemental Tables

### Table S1. Details of modern populations and number of overlapping SNPs used for genome-wide data analyses of the study

Separate file: Table\_S1.xls

### Table S2. Detail information of ancient samples used in various analyses of this study

Separate file: Table\_S2.xls

### Table S3. Mitochondrial genotyping in sampled Northwest Indians

#### (A). Haplogroup wise mtDNA frequency

| Population | n   | D     | F     | M9    | M     | M18   | M1    | M2    | M3    | M30   | M31   | M33   | M34   | M4    | M40   | M5    | M52   | M57   | M6    | R5    | U2    | N     | R     | R0    | R2    | R2'JT | T     | H     | HV    | HV2   | I     | J     | K     | U3    | U5    | U7    | U9    | W     |
|------------|-----|-------|-------|-------|-------|-------|-------|-------|-------|-------|-------|-------|-------|-------|-------|-------|-------|-------|-------|-------|-------|-------|-------|-------|-------|-------|-------|-------|-------|-------|-------|-------|-------|-------|-------|-------|-------|-------|
| Gujjar     | 44  | 0.068 | 0.000 | 0.023 | 0.068 | 0.000 | 0.000 | 0.000 | 0.091 | 0.045 | 0.000 | 0.000 | 0.000 | 0.000 | 0.023 | 0.045 | 0.045 | 0.000 | 0.000 | 0.045 | 0.068 | 0.000 | 0.000 | 0.000 | 0.045 | 0.045 | 0.068 | 0.023 | 0.000 | 0.000 | 0.000 | 0.068 | 0.000 | 0.000 | 0.023 | 0.182 | 0.000 | 0.023 |
| Ror        | 104 | 0.010 | 0.010 | 0.019 | 0.067 | 0.000 | 0.000 | 0.010 | 0.115 | 0.125 | 0.000 | 0.010 | 0.010 | 0.029 | 0.000 | 0.125 | 0.010 | 0.000 | 0.000 | 0.000 | 0.096 | 0.010 | 0.000 | 0.038 | 0.000 | 0.000 | 0.038 | 0.010 | 0.038 | 0.010 | 0.000 | 0.029 | 0.000 | 0.010 | 0.019 | 0.077 | 0.010 | 0.077 |
| Kamboj     | 42  | 0.048 | 0.000 | 0.024 | 0.048 | 0.024 | 0.000 | 0.024 | 0.095 | 0.024 | 0.000 | 0.000 | 0.000 | 0.000 | 0.000 | 0.095 | 0.000 | 0.024 | 0.024 | 0.000 | 0.071 | 0.048 | 0.048 | 0.000 | 0.000 | 0.000 | 0.024 | 0.048 | 0.000 | 0.000 | 0.024 | 0.024 | 0.024 | 0.000 | 0.000 | 0.262 | 0.000 | 0.000 |

**(B). Regional mtDNA haplogroups** the acronyms we used are: C Asia, Central Asia; E Asia, East Asia; SE Asia, Southeast Asia; S Asia, South Asia; W Eurasia, West Eurasia.

| Population | n  | C Asia | E Asia + SE Asia | S Asia | W Eurasia |
|------------|----|--------|------------------|--------|-----------|
| Gujjar     | 41 | 0.073  | 0.024            | 0.390  | 0.512     |
| Ror        | 96 | 0.010  | 0.031            | 0.583  | 0.375     |
| Kamboj     | 36 | 0.056  | 0.028            | 0.444  | 0.472     |

## Table S4. Y-chromosomal genotyping in sampled Northwest Indians

(A). Y haplogroups frequency tabling the occurrence of main haplogroups

| Population | n   | C-M356 | H-M69 | R2-M124 | L-M11 | J2-M172 | R1a1-M17 | Q-M242 |
|------------|-----|--------|-------|---------|-------|---------|----------|--------|
| Ror        | 139 | 0.06   | 0.08  | 0.08    | 0.29  | 0.13    | 0.35     | 0.01   |
| Kamboj     | 52  | 0.04   | 0.15  | 0.06    | 0.17  | 0.06    | 0.52     | 0.00   |
| Gujjar     | 57  | 0.00   | 0.07  | 0.09    | 0.63  | 0.02    | 0.19     | 0.00   |

(B). **Regional haplogroups** we display the occurrence of major regional Y chromosomal haplogroups in newly sampled individuals

| Population | n   | S Asian | W Eurasian | R1a  | C Asian/ C Siberian |
|------------|-----|---------|------------|------|---------------------|
| Ror        | 139 | 0.52    | 0.13       | 0.35 | 0.01                |
| Kamboj     | 52  | 0.42    | 0.06       | 0.52 | 0.00                |
| Gujjar     | 57  | 0.79    | 0.02       | 0.19 | 0.00                |

**Table S5. The population wise  $F_{ST}$  values based on autosomal dataset of studied populations**

Separate file\_Table S5.xls

**Table S6. Formal test of admixture for PNWI and Gangetic Plain populations** we used  $f_3$  test in form of  $f_3(X, Y; \text{PNWI/NI\_IE})$  where X is related to ancient or modern groups from West Eurasia and Y is a modern South Asian population (Paniya) representing the Ancestral South India (ASI). Steppe\_EMBA = Early Bronze Age Steppe, Steppe\_MLBA= Middle Late Bronze Age Steppe, Anatolia\_N = Neolithic Anatolia, IranTuran\_N = Neolithic Iran Turan, Iran\_N = Neolithic Iran, BMAC = Bactrian Margiana Complex, CHG = Caucasus Hunter-Gatherers, WHG = Western Hunter-Gatherers, EHG = Eastern Hunter-Gatherers, Indus\_Diaspora = Indus\_Periphery, SPGT = Iron Age South Asians, SouthAsia\_H = Early historical South Asia.

| source1        | source2 | Target | $f_3$     | std err  | Z score |
|----------------|---------|--------|-----------|----------|---------|
| Steppe_MLBA    | Paniya  | Ror    | -0.007603 | 0.000315 | -24.165 |
| Steppe_EMBA    | Paniya  | Ror    | -0.008151 | 0.000343 | -23.768 |
| French         | Paniya  | Ror    | -0.007271 | 0.000324 | -22.475 |
| Anatolia_N     | Paniya  | Ror    | -0.006213 | 0.000433 | -14.353 |
| BMAC           | Paniya  | Ror    | -0.003462 | 0.000337 | -10.269 |
| Iranians       | Paniya  | Ror    | -0.003012 | 0.000324 | -9.296  |
| EHG            | Paniya  | Ror    | -0.00684  | 0.000756 | -9.045  |
| Namazga_CA     | Paniya  | Ror    | -0.004222 | 0.000576 | -7.332  |
| CHG            | Paniya  | Ror    | -0.004933 | 0.000678 | -7.279  |
| WHG            | Paniya  | Ror    | -0.002781 | 0.000626 | -4.439  |
| IranTuran_N    | Paniya  | Ror    | -0.002564 | 0.000646 | -3.968  |
| Iran_N         | Paniya  | Ror    | -0.002897 | 0.00112  | -2.587  |
| Kalash         | Paniya  | Ror    | 0.001265  | 0.000388 | 3.261   |
| SPGT           | Paniya  | Ror    | 0.004528  | 0.00034  | 13.334  |
| Indus_Diaspora | Paniya  | Ror    | 0.010129  | 0.00071  | 14.271  |
| SouthAsia_H    | Paniya  | Ror    | 0.007152  | 0.000375 | 19.07   |
| BMAC           | Paniya  | Gujjar | -0.006989 | 0.000297 | -23.54  |
| Steppe_EMBA    | Paniya  | Gujjar | -0.007728 | 0.000334 | -23.157 |
| Steppe_MLBA    | Paniya  | Gujjar | -0.006815 | 0.000309 | -22.084 |
| French         | Paniya  | Gujjar | -0.007148 | 0.000336 | -21.283 |
| Iranians       | Paniya  | Gujjar | -0.005664 | 0.000298 | -19.019 |
| Anatolia_N     | Paniya  | Gujjar | -0.007043 | 0.000397 | -17.72  |
| Namazga_CA     | Paniya  | Gujjar | -0.008219 | 0.000565 | -14.546 |
| CHG            | Paniya  | Gujjar | -0.008741 | 0.00063  | -13.874 |
| IranTuran_N    | Paniya  | Gujjar | -0.008236 | 0.000624 | -13.2   |
| Iran_N         | Paniya  | Gujjar | -0.008134 | 0.001101 | -7.387  |
| Kalash         | Paniya  | Gujjar | -0.002188 | 0.000328 | -6.677  |
| EHG            | Paniya  | Gujjar | -0.004514 | 0.000757 | -5.962  |
| Ror            | Paniya  | Gujjar | -0.000864 | 0.000295 | -2.926  |
| WHG            | Paniya  | Gujjar | -0.001178 | 0.00062  | -1.899  |
| SPGT           | Paniya  | Gujjar | 0.000318  | 0.000295 | 1.077   |
| Indus_Diaspora | Paniya  | Gujjar | 0.004152  | 0.000668 | 6.219   |
| SouthAsia_H    | Paniya  | Gujjar | 0.002968  | 0.000325 | 9.132   |
| Steppe_EMBA    | Paniya  | Kamboj | -0.005587 | 0.00035  | -15.986 |
| French         | Paniya  | Kamboj | -0.005505 | 0.000353 | -15.597 |
| Steppe_MLBA    | Paniya  | Kamboj | -0.004983 | 0.000325 | -15.311 |
| Anatolia_N     | Paniya  | Kamboj | -0.005769 | 0.00044  | -13.122 |
| BMAC           | Paniya  | Kamboj | -0.004049 | 0.000342 | -11.827 |
| Iranians       | Paniya  | Kamboj | -0.00321  | 0.000333 | -9.641  |
| Namazga_CA     | Paniya  | Kamboj | -0.004907 | 0.000594 | -8.262  |
| CHG            | Paniya  | Kamboj | -0.00571  | 0.000697 | -8.196  |
| IranTuran_N    | Paniya  | Kamboj | -0.004751 | 0.000644 | -7.375  |
| EHG            | Paniya  | Kamboj | -0.003596 | 0.000748 | -4.807  |
| Iran_N         | Paniya  | Kamboj | -0.004286 | 0.00111  | -3.86   |
| WHG            | Paniya  | Kamboj | -0.000397 | 0.00064  | -0.62   |
| Kalash         | Paniya  | Kamboj | 0.00067   | 0.000376 | 1.778   |
| Ror            | Paniya  | Kamboj | 0.002141  | 0.000323 | 6.625   |
| SPGT           | Paniya  | Kamboj | 0.003248  | 0.000332 | 9.771   |
| Indus_Diaspora | Paniya  | Kamboj | 0.007481  | 0.000697 | 10.728  |
| SouthAsia_H    | Paniya  | Kamboj | 0.005899  | 0.000362 | 16.274  |

|                |        |             |           |          |         |
|----------------|--------|-------------|-----------|----------|---------|
| Steppe_EMBA    | Paniya | Khatri      | -0.007207 | 0.000311 | -23.18  |
| French         | Paniya | Khatri      | -0.006927 | 0.000313 | -22.153 |
| Steppe_MLBA    | Paniya | Khatri      | -0.006301 | 0.000286 | -22.037 |
| BMAC           | Paniya | Khatri      | -0.005825 | 0.000279 | -20.913 |
| Anatolia_N     | Paniya | Khatri      | -0.006566 | 0.000403 | -16.291 |
| Iranians       | Paniya | Khatri      | -0.00455  | 0.000286 | -15.924 |
| Namazga_CA     | Paniya | Khatri      | -0.00673  | 0.000521 | -12.924 |
| CHG            | Paniya | Khatri      | -0.007331 | 0.000621 | -11.812 |
| IranTuran_N    | Paniya | Khatri      | -0.006125 | 0.0006   | -10.216 |
| EHG            | Paniya | Khatri      | -0.004702 | 0.000722 | -6.51   |
| Iran_N         | Paniya | Khatri      | -0.005892 | 0.001044 | -5.642  |
| Kalash         | Paniya | Khatri      | -0.000788 | 0.000322 | -2.446  |
| WHG            | Paniya | Khatri      | -0.00122  | 0.000591 | -2.064  |
| Ror            | Paniya | Khatri      | 0.00115   | 0.000281 | 4.095   |
| SPGT           | Paniya | Khatri      | 0.002147  | 0.000267 | 8.038   |
| Indus_Diaspora | Paniya | Khatri      | 0.006635  | 0.000654 | 10.144  |
| SouthAsia_H    | Paniya | Khatri      | 0.004834  | 0.00032  | 15.103  |
| French         | Paniya | Pathan      | -0.009491 | 0.000281 | -33.748 |
| Steppe_MLBA    | Paniya | Pathan      | -0.008505 | 0.000255 | -33.296 |
| Steppe_EMBA    | Paniya | Pathan      | -0.009326 | 0.000296 | -31.544 |
| BMAC           | Paniya | Pathan      | -0.007356 | 0.000265 | -27.779 |
| Iranians       | Paniya | Pathan      | -0.006722 | 0.00026  | -25.874 |
| Anatolia_N     | Paniya | Pathan      | -0.009425 | 0.000384 | -24.52  |
| Namazga_CA     | Paniya | Pathan      | -0.008525 | 0.000538 | -15.835 |
| CHG            | Paniya | Pathan      | -0.009156 | 0.000592 | -15.469 |
| IranTuran_N    | Paniya | Pathan      | -0.007976 | 0.00058  | -13.748 |
| EHG            | Paniya | Pathan      | -0.006436 | 0.000682 | -9.441  |
| Iran_N         | Paniya | Pathan      | -0.008657 | 0.000986 | -8.78   |
| WHG            | Paniya | Pathan      | -0.003808 | 0.000556 | -6.847  |
| Kalash         | Paniya | Pathan      | -0.001983 | 0.000309 | -6.426  |
| Ror            | Paniya | Pathan      | 0.000204  | 0.000262 | 0.778   |
| SPGT           | Paniya | Pathan      | 0.001166  | 0.000252 | 4.621   |
| Indus_Diaspora | Paniya | Pathan      | 0.006603  | 0.000647 | 10.206  |
| SouthAsia_H    | Paniya | Pathan      | 0.004243  | 0.000309 | 13.726  |
| BMAC           | Paniya | Gujaratis   | -0.00697  | 0.000242 | -28.806 |
| Steppe_EMBA    | Paniya | Gujaratis   | -0.007409 | 0.000261 | -28.413 |
| Steppe_MLBA    | Paniya | Gujaratis   | -0.006494 | 0.000239 | -27.189 |
| French         | Paniya | Gujaratis   | -0.007031 | 0.000262 | -26.85  |
| Iranians       | Paniya | Gujaratis   | -0.005871 | 0.00024  | -24.454 |
| Anatolia_N     | Paniya | Gujaratis   | -0.006482 | 0.000325 | -19.939 |
| Namazga_CA     | Paniya | Gujaratis   | -0.008034 | 0.00044  | -18.256 |
| IranTuran_N    | Paniya | Gujaratis   | -0.007774 | 0.000485 | -16.019 |
| Kalash         | Paniya | Gujaratis   | -0.004007 | 0.000252 | -15.886 |
| CHG            | Paniya | Gujaratis   | -0.007501 | 0.000508 | -14.753 |
| Ror            | Paniya | Gujaratis   | -0.002904 | 0.000205 | -14.183 |
| SPGT           | Paniya | Gujaratis   | -0.002103 | 0.000188 | -11.214 |
| EHG            | Paniya | Gujaratis   | -0.005673 | 0.00059  | -9.613  |
| Iran_N         | Paniya | Gujaratis   | -0.008246 | 0.000858 | -9.609  |
| WHG            | Paniya | Gujaratis   | -0.002584 | 0.000485 | -5.328  |
| SouthAsia_H    | Paniya | Gujaratis   | -0.000468 | 0.00021  | -2.229  |
| Indus_Diaspora | Paniya | Gujaratis   | -0.000101 | 0.000497 | -0.204  |
| Steppe_EMBA    | Paniya | Brahmins_UP | -0.011508 | 0.000402 | -28.612 |
| Steppe_MLBA    | Paniya | Brahmins_UP | -0.010736 | 0.000394 | -27.247 |
| French         | Paniya | Brahmins_UP | -0.010907 | 0.000415 | -26.294 |
| BMAC           | Paniya | Brahmins_UP | -0.009068 | 0.000406 | -22.336 |
| Iranians       | Paniya | Brahmins_UP | -0.008516 | 0.000403 | -21.147 |
| Anatolia_N     | Paniya | Brahmins_UP | -0.01016  | 0.000483 | -21.049 |
| Namazga_CA     | Paniya | Brahmins_UP | -0.009662 | 0.000663 | -14.572 |
| IranTuran_N    | Paniya | Brahmins_UP | -0.009571 | 0.000703 | -13.607 |
| Kalash         | Paniya | Brahmins_UP | -0.005703 | 0.000427 | -13.354 |
| CHG            | Paniya | Brahmins_UP | -0.009513 | 0.00072  | -13.206 |
| Ror            | Paniya | Brahmins_UP | -0.004646 | 0.000386 | -12.036 |
| EHG            | Paniya | Brahmins_UP | -0.010244 | 0.000855 | -11.982 |
| WHG            | Paniya | Brahmins_UP | -0.007495 | 0.000671 | -11.162 |
| SPGT           | Paniya | Brahmins_UP | -0.003662 | 0.000391 | -9.37   |
| Iran_N         | Paniya | Brahmins_UP | -0.010985 | 0.001215 | -9.038  |
| SouthAsia_H    | Paniya | Brahmins_UP | -0.002036 | 0.00041  | -4.971  |
| Indus_Diaspora | Paniya | Brahmins_UP | -0.000647 | 0.000729 | -0.888  |

**Table S7. *D* statistics to test if Ror and Kalash belong to same clade we applied *D* stat in form of  $D(\text{Yoruba}, X; \text{Ror}, \text{Kalash})$  where *X* is a global population.**

| Yoruba | pop1           | pop2 | pop3   | Dstat   | Z score |
|--------|----------------|------|--------|---------|---------|
| Yoruba | Ho             | Ror  | Kalash | -0.0048 | -4.722  |
| Yoruba | Onge           | Ror  | Kalash | -0.0057 | -4.711  |
| Yoruba | Gond           | Ror  | Kalash | -0.0045 | -4.554  |
| Yoruba | Paniya         | Ror  | Kalash | -0.0043 | -4.047  |
| Yoruba | Irula          | Ror  | Kalash | -0.0041 | -3.952  |
| Yoruba | Juang          | Ror  | Kalash | -0.0049 | -3.857  |
| Yoruba | Chamar         | Ror  | Kalash | -0.0034 | -3.372  |
| Yoruba | Kol            | Ror  | Kalash | -0.0026 | -2.765  |
| Yoruba | Tharu          | Ror  | Kalash | -0.0027 | -2.649  |
| Yoruba | Dharkars       | Ror  | Kalash | -0.0025 | -2.569  |
| Yoruba | Kshatriya      | Ror  | Kalash | -0.0024 | -2.475  |
| Yoruba | Burmese        | Ror  | Kalash | -0.0026 | -2.353  |
| Yoruba | Kurmi          | Ror  | Kalash | -0.0035 | -2.272  |
| Yoruba | Papuans        | Ror  | Kalash | -0.0026 | -2.122  |
| Yoruba | Naga           | Ror  | Kalash | -0.0026 | -2      |
| Yoruba | Brahmins_UP    | Ror  | Kalash | -0.0018 | -1.887  |
| Yoruba | Gujaratis      | Ror  | Kalash | -0.0017 | -1.874  |
| Yoruba | Japanese       | Ror  | Kalash | -0.0022 | -1.866  |
| Yoruba | Han            | Ror  | Kalash | -0.0018 | -1.567  |
| Yoruba | Estonians      | Ror  | Kalash | -0.0015 | -1.516  |
| Yoruba | Cambodians     | Ror  | Kalash | -0.0017 | -1.458  |
| Yoruba | Gujjar         | Ror  | Kalash | -0.0013 | -1.413  |
| Yoruba | Kurumba        | Ror  | Kalash | -0.0015 | -1.328  |
| Yoruba | Germans        | Ror  | Kalash | -0.0012 | -1.165  |
| Yoruba | French         | Ror  | Kalash | -0.0011 | -1.145  |
| Yoruba | Kamboj         | Ror  | Kalash | -0.0006 | -0.643  |
| Yoruba | Kazakhs        | Ror  | Kalash | -0.0006 | -0.601  |
| Yoruba | Hazara         | Ror  | Kalash | -0.0001 | -0.094  |
| Yoruba | North_Italians | Ror  | Kalash | 0.0001  | 0.132   |
| Yoruba | Sindhi         | Ror  | Kalash | 0.0003  | 0.302   |
| Yoruba | Khatri         | Ror  | Kalash | 0.0003  | 0.352   |
| Yoruba | Pathan         | Ror  | Kalash | 0.0009  | 0.978   |
| Yoruba | Palestinians   | Ror  | Kalash | 0.0012  | 1.404   |
| Yoruba | Balochi        | Ror  | Kalash | 0.0013  | 1.51    |
| Yoruba | Yagnobi        | Ror  | Kalash | 0.002   | 1.852   |
| Yoruba | Burusho        | Ror  | Kalash | 0.0017  | 1.875   |
| Yoruba | Makrani        | Ror  | Kalash | 0.0019  | 2.203   |
| Yoruba | Pamiris        | Ror  | Kalash | 0.0021  | 2.325   |
| Yoruba | Brahui         | Ror  | Kalash | 0.0021  | 2.408   |
| Yoruba | Armenians      | Ror  | Kalash | 0.0025  | 2.702   |
| Yoruba | Iranians       | Ror  | Kalash | 0.0025  | 2.827   |
| Yoruba | Azeris         | Ror  | Kalash | 0.0026  | 2.878   |
| Yoruba | Georgians      | Ror  | Kalash | 0.0039  | 4.046   |



**Table S8. Gene flow among PNWI and NI\_IE and their relative affinity with Europe**  $D$  statistics in form  $D(\text{pop1}, \text{Yoruba}; \text{pop2}, \text{pop3})$ , where pop1 is any South Asians/French and pop2 is Gujaratis/Pathan/Ror and pop3 is any of modern South Asians, show relative allele sharing of Pakistani, Northwest Indians and North Indians among themselves striking out the Ror's closeness with Pathan and Kalash and their highest affinity with Europe than other South Asians. PNWI = Pakistani and Northwest Indians, NI\_IE = North Indian Indo-Europeans from Gangetic Plain, Brahmins\_UP = Brahmins from Uttar Pradesh.

| pop1   | Yoruba | pop2      | pop3        | Dstat   | Z score |
|--------|--------|-----------|-------------|---------|---------|
| Pathan | Yoruba | Gujaratis | Ror         | -0.0057 | -8.208  |
| Pathan | Yoruba | Gujaratis | Kalash      | -0.0066 | -8.062  |
| Pathan | Yoruba | Gujaratis | Khatri      | -0.0044 | -7.596  |
| Pathan | Yoruba | Gujaratis | Gujjar      | -0.0030 | -5.439  |
| Pathan | Yoruba | Gujaratis | Brahmins_UP | -0.0023 | -3.218  |
| Pathan | Yoruba | Gujaratis | Kamboj      | -0.0017 | -2.777  |
| Pathan | Yoruba | Gujaratis | Jatt        | -0.0046 | -2.382  |
| Pathan | Yoruba | Gujaratis | Kshatriya   | 0.0000  | 0.029   |
| Pathan | Yoruba | Gujaratis | Sindhi      | 0.0081  | 14.447  |
| Kalash | Yoruba | Gujaratis | Ror         | -0.0083 | -10.948 |
| Kalash | Yoruba | Gujaratis | Khatri      | -0.0063 | -9.982  |
| Kalash | Yoruba | Gujaratis | Pathan      | -0.0063 | -9.759  |
| Kalash | Yoruba | Gujaratis | Gujjar      | -0.0035 | -5.673  |
| Kalash | Yoruba | Gujaratis | Kamboj      | -0.0032 | -4.644  |
| Kalash | Yoruba | Gujaratis | Jatt        | -0.0068 | -3.187  |
| Kalash | Yoruba | Gujaratis | Brahmins_UP | -0.0023 | -2.911  |
| Kalash | Yoruba | Pathan    | Ror         | -0.002  | -2.612  |
| Kalash | Yoruba | Gujaratis | Kshatriya   | -0.0003 | -0.356  |
| French | Yoruba | Ror       | Jatt        | 0.0013  | 0.643   |
| French | Yoruba | Ror       | Kalash      | 0.0011  | 1.145   |
| French | Yoruba | Ror       | Pathan      | 0.0041  | 5.242   |
| French | Yoruba | Ror       | Khatri      | 0.0076  | 9.532   |
| French | Yoruba | Ror       | Kamboj      | 0.0102  | 11.075  |
| French | Yoruba | Ror       | Burusho     | 0.0108  | 13.669  |
| French | Yoruba | Ror       | Brahmins_UP | 0.014   | 14.326  |
| French | Yoruba | Ror       | Gujjar      | 0.0129  | 14.994  |
| French | Yoruba | Ror       | Brahui      | 0.0131  | 15.605  |
| French | Yoruba | Ror       | Kshatriya   | 0.0182  | 17.795  |
| French | Yoruba | Ror       | Muslim      | 0.0227  | 19.351  |
| French | Yoruba | Ror       | Sindhi      | 0.0203  | 26.019  |
| French | Yoruba | Ror       | Makrani     | 0.0238  | 26.793  |
| French | Yoruba | Ror       | Gujaratis   | 0.0213  | 27.305  |
| French | Yoruba | Ror       | Maratha     | 0.0335  | 27.42   |
| French | Yoruba | Ror       | Chamar      | 0.0348  | 29.353  |
| French | Yoruba | Ror       | Irula       | 0.0469  | 35.408  |
| French | Yoruba | Ror       | Ho          | 0.0547  | 41.695  |

**Table S9. *D* statistics for relative allele sharing of South Asians with a set of distal ancient sources** we used *D* stat in form  $D(\text{pop1}, \text{Yoruba}; \text{pop2}, \text{pop3})$ , where pop1 is any South Asians and pop2 is Steppe\_EMBA/Anatolia\_N and pop3 is any of modern South Asians/Iran\_N/EHG/Levant\_N, highlighting Ror as the closest South Asian to Steppe\_EMBA and Anatolia\_N.

| pop1        | Yoruba | pop2        | pop3   | Dstat   | Z score |
|-------------|--------|-------------|--------|---------|---------|
| Jatt        | Yoruba | Steppe_EMBA | Iran_N | 0.0045  | 7.314   |
| Paniya      | Yoruba | Steppe_EMBA | Iran_N | 0.0032  | 8.369   |
| Sindhi      | Yoruba | Steppe_EMBA | Iran_N | 0.0028  | 8.434   |
| Gujjar      | Yoruba | Steppe_EMBA | Iran_N | 0.0031  | 8.905   |
| Chamar      | Yoruba | Steppe_EMBA | Iran_N | 0.0033  | 9.181   |
| Kshatriya   | Yoruba | Steppe_EMBA | Iran_N | 0.0036  | 9.392   |
| Ho          | Yoruba | Steppe_EMBA | Iran_N | 0.0035  | 9.558   |
| Gujaratis   | Yoruba | Steppe_EMBA | Iran_N | 0.0031  | 9.609   |
| Pathan      | Yoruba | Steppe_EMBA | Iran_N | 0.0033  | 9.872   |
| Khatri      | Yoruba | Steppe_EMBA | Iran_N | 0.0035  | 10.039  |
| Brahmins_UP | Yoruba | Steppe_EMBA | Iran_N | 0.0040  | 10.525  |
| Kamboj      | Yoruba | Steppe_EMBA | Iran_N | 0.0038  | 10.789  |
| Kalash      | Yoruba | Steppe_EMBA | Iran_N | 0.0040  | 11.209  |
| Ror         | Yoruba | Steppe_EMBA | Iran_N | 0.0050  | 14.259  |
| Ho          | Yoruba | Steppe_EMBA | EHG    | -0.0014 | -4.948  |
| Paniya      | Yoruba | Steppe_EMBA | EHG    | -0.0011 | -3.508  |
| Chamar      | Yoruba | Steppe_EMBA | EHG    | -0.0009 | -2.866  |
| Jatt        | Yoruba | Steppe_EMBA | EHG    | -0.0013 | -2.499  |
| Kshatriya   | Yoruba | Steppe_EMBA | EHG    | -0.0006 | -1.967  |
| Ror         | Yoruba | Steppe_EMBA | EHG    | -0.0005 | -1.804  |
| Gujaratis   | Yoruba | Steppe_EMBA | EHG    | -0.0004 | -1.444  |
| Brahmins_UP | Yoruba | Steppe_EMBA | EHG    | -0.0003 | -1.019  |
| Kalash      | Yoruba | Steppe_EMBA | EHG    | -0.0003 | -0.859  |
| Kamboj      | Yoruba | Steppe_EMBA | EHG    | -0.0002 | -0.729  |
| Gujjar      | Yoruba | Steppe_EMBA | EHG    | 0.0000  | -0.152  |
| Sindhi      | Yoruba | Steppe_EMBA | EHG    | 0.0000  | -0.036  |
| Pathan      | Yoruba | Steppe_EMBA | EHG    | 0.0000  | 0.079   |
| Khatri      | Yoruba | Steppe_EMBA | EHG    | 0.0000  | 0.127   |
| Gujaratis   | Yoruba | Anatolia_N  | Iran_N | 0.0000  | -0.064  |
| Gujjar      | Yoruba | Anatolia_N  | Iran_N | 0.0001  | 0.237   |
| Sindhi      | Yoruba | Anatolia_N  | Iran_N | 0.0001  | 0.412   |
| Chamar      | Yoruba | Anatolia_N  | Iran_N | 0.0002  | 0.523   |
| Kshatriya   | Yoruba | Anatolia_N  | Iran_N | 0.0002  | 0.594   |
| Paniya      | Yoruba | Anatolia_N  | Iran_N | 0.0003  | 0.68    |
| Khatri      | Yoruba | Anatolia_N  | Iran_N | 0.0003  | 0.906   |
| Kalash      | Yoruba | Anatolia_N  | Iran_N | 0.0006  | 1.49    |
| Jatt        | Yoruba | Anatolia_N  | Iran_N | 0.0010  | 1.642   |
| Pathan      | Yoruba | Anatolia_N  | Iran_N | 0.0006  | 1.725   |
| Brahmins_UP | Yoruba | Anatolia_N  | Iran_N | 0.0007  | 1.834   |
| Ho          | Yoruba | Anatolia_N  | Iran_N | 0.0007  | 1.944   |
| Kamboj      | Yoruba | Anatolia_N  | Iran_N | 0.0010  | 2.732   |
| Ror         | Yoruba | Anatolia_N  | Iran_N | 0.0017  | 4.572   |

|             |        |            |          |         |         |
|-------------|--------|------------|----------|---------|---------|
| Ho          | Yoruba | Anatolia_N | EHG      | -0.0042 | -12.203 |
| Ror         | Yoruba | Anatolia_N | EHG      | -0.0039 | -12.066 |
| Gujaratis   | Yoruba | Anatolia_N | EHG      | -0.0036 | -11.83  |
| Chamar      | Yoruba | Anatolia_N | EHG      | -0.0039 | -11.598 |
| Paniya      | Yoruba | Anatolia_N | EHG      | -0.0041 | -11.392 |
| Kshatriya   | Yoruba | Anatolia_N | EHG      | -0.0040 | -11.196 |
| Kalash      | Yoruba | Anatolia_N | EHG      | -0.0037 | -10.796 |
| Brahmins_UP | Yoruba | Anatolia_N | EHG      | -0.0036 | -10.491 |
| Gujjar      | Yoruba | Anatolia_N | EHG      | -0.0031 | -9.882  |
| Khatri      | Yoruba | Anatolia_N | EHG      | -0.0031 | -9.532  |
| Kamboj      | Yoruba | Anatolia_N | EHG      | -0.0031 | -9.125  |
| Sindhi      | Yoruba | Anatolia_N | EHG      | -0.0027 | -8.874  |
| Pathan      | Yoruba | Anatolia_N | EHG      | -0.0028 | -8.642  |
| Jatt        | Yoruba | Anatolia_N | EHG      | -0.0048 | -7.727  |
| Jatt        | Yoruba | Anatolia_N | Levant_N | 0.0032  | 7.098   |
| Ho          | Yoruba | Anatolia_N | Levant_N | 0.0019  | 7.185   |
| Paniya      | Yoruba | Anatolia_N | Levant_N | 0.0021  | 7.328   |
| Chamar      | Yoruba | Anatolia_N | Levant_N | 0.0023  | 8.122   |
| Kshatriya   | Yoruba | Anatolia_N | Levant_N | 0.0026  | 9.168   |
| Brahmins_UP | Yoruba | Anatolia_N | Levant_N | 0.0028  | 10.154  |
| Gujaratis   | Yoruba | Anatolia_N | Levant_N | 0.0026  | 10.552  |
| Sindhi      | Yoruba | Anatolia_N | Levant_N | 0.0025  | 10.554  |
| Gujjar      | Yoruba | Anatolia_N | Levant_N | 0.0028  | 10.7    |
| Pathan      | Yoruba | Anatolia_N | Levant_N | 0.0028  | 11.051  |
| Kamboj      | Yoruba | Anatolia_N | Levant_N | 0.0029  | 11.204  |
| Ror         | Yoruba | Anatolia_N | Levant_N | 0.0031  | 11.289  |
| Kalash      | Yoruba | Anatolia_N | Levant_N | 0.0031  | 11.541  |
| Khatri      | Yoruba | Anatolia_N | Levant_N | 0.0030  | 11.765  |

**Table S10. *D* statistics for relative allele sharing of South Asians with a set of proximal ancient sources we computed *D stat* in form of *D* (pop1, Yoruba; pop2, pop3), where pop1 is South Asians, pop2 is different aDNA sources and pop3 refers to aDNA samples or modern Dravidian displaying relative allele sharing of South Asians with neighboring (proximal) ancient sources from South Asia and Central Asia.**

Separate file\_Table S10.xls

**Table S11. *qpAdm* with Steppe\_MLBA** we used *qpAdm* to deduce ancestry proportion from distal ancient sources (Iran\_N, Steppe\_MLBA and Onge) among South Asians. Only populations with p value > 0.5 have been reported leaving out Kalash, SPGT, Burusho, Hazara, IN\_AA and IN\_TB (p value < 0.5).

| Target Pop      | p value   | Mix coeff1 | Mix coeff2 | Mix coeff3 | std err1 | std err2 | std err3 | Source1 | Source2     | Source3 |
|-----------------|-----------|------------|------------|------------|----------|----------|----------|---------|-------------|---------|
| Ror             | 0.295723  | 0.179      | 0.621      | 0.2        | 0.028    | 0.024    | 0.014    | Iran_N  | Steppe_MLBA | Onge    |
| Khatri          | 0.0898528 | 0.198      | 0.553      | 0.249      | 0.03     | 0.025    | 0.015    | Iran_N  | Steppe_MLBA | Onge    |
| Gujjar          | 0.266217  | 0.214      | 0.492      | 0.295      | 0.032    | 0.028    | 0.016    | Iran_N  | Steppe_MLBA | Onge    |
| Kamboj          | 0.124754  | 0.253      | 0.485      | 0.263      | 0.032    | 0.027    | 0.017    | Iran_N  | Steppe_MLBA | Onge    |
| Pathan          | 0.334088  | 0.236      | 0.547      | 0.217      | 0.027    | 0.024    | 0.014    | Iran_N  | Steppe_MLBA | Onge    |
| Jatt            | 0.258625  | 0.084      | 0.703      | 0.213      | 0.08     | 0.07     | 0.038    | Iran_N  | Steppe_MLBA | Onge    |
| Sindhi          | 0.116182  | 0.51       | 0.291      | 0.199      | 0.04     | 0.034    | 0.019    | Iran_N  | Steppe_MLBA | Onge    |
| Balochi         | 0.777542  | 0.583      | 0.287      | 0.13       | 0.043    | 0.037    | 0.021    | Iran_N  | Steppe_MLBA | Onge    |
| Brahui          | 0.355776  | 0.629      | 0.269      | 0.102      | 0.046    | 0.04     | 0.022    | Iran_N  | Steppe_MLBA | Onge    |
| Makrani         | 0.47551   | 1          | NA         | NA         | 0.062    | NA       | NA       | Iran_N  | Steppe_MLBA | Onge    |
| Brahmin_Guj     | 0.148345  | 0.211      | 0.489      | 0.3        | 0.03     | 0.025    | 0.015    | Iran_N  | Steppe_MLBA | Onge    |
| Gujaratis       | 0.0905237 | 0.171      | 0.443      | 0.385      | 0.031    | 0.026    | 0.015    | Iran_N  | Steppe_MLBA | Onge    |
| Brahmins_UP     | 0.220679  | 0.142      | 0.51       | 0.348      | 0.036    | 0.031    | 0.018    | Iran_N  | Steppe_MLBA | Onge    |
| Kshatriya       | 0.173372  | 0.175      | 0.464      | 0.361      | 0.037    | 0.031    | 0.018    | Iran_N  | Steppe_MLBA | Onge    |
| Chamar          | 0.0602319 | 0.076      | 0.357      | 0.567      | 0.039    | 0.035    | 0.02     | Iran_N  | Steppe_MLBA | Onge    |
| Kanjars         | 0.734447  | 0.182      | 0.373      | 0.445      | 0.038    | 0.033    | 0.02     | Iran_N  | Steppe_MLBA | Onge    |
| Kurmi           | 0.291761  | 0.083      | 0.51       | 0.408      | 0.076    | 0.067    | 0.04     | Iran_N  | Steppe_MLBA | Onge    |
| Dharkars        | 0.53426   | 0.099      | 0.463      | 0.437      | 0.035    | 0.03     | 0.018    | Iran_N  | Steppe_MLBA | Onge    |
| Muslim          | 0.0880746 | 0.108      | 0.443      | 0.449      | 0.046    | 0.04     | 0.022    | Iran_N  | Steppe_MLBA | Onge    |
| Maratha         | 0.50061   | 0.139      | 0.336      | 0.525      | 0.04     | 0.036    | 0.02     | Iran_N  | Steppe_MLBA | Onge    |
| Meena           | 0.256096  | 0.16       | 0.512      | 0.328      | 0.078    | 0.07     | 0.038    | Iran_N  | Steppe_MLBA | Onge    |
| Meghawal        | 0.0920744 | 0.183      | 0.339      | 0.479      | 0.084    | 0.07     | 0.04     | Iran_N  | Steppe_MLBA | Onge    |
| Kol             | 0.260324  | 0.063      | 0.408      | 0.528      | 0.034    | 0.031    | 0.017    | Iran_N  | Steppe_MLBA | Onge    |
| Gond            | 0.210592  | NA         | 0.28       | 0.72       | NA       | 0.035    | 0.021    | Iran_N  | Steppe_MLBA | Onge    |
| Kurumba         | 0.445845  | 0.227      | 0.3        | 0.473      | 0.048    | 0.042    | 0.025    | Iran_N  | Steppe_MLBA | Onge    |
| Paniya          | 0.309749  | 0.074      | 0.162      | 0.764      | 0.044    | 0.039    | 0.023    | Iran_N  | Steppe_MLBA | Onge    |
| Irula           | 0.138575  | 0.136      | 0.198      | 0.667      | 0.045    | 0.038    | 0.023    | Iran_N  | Steppe_MLBA | Onge    |
| SouthAsia_H     | 0.629248  | 0.165      | 0.542      | 0.293      | 0.03     | 0.027    | 0.015    | Iran_N  | Steppe_MLBA | Onge    |
| BMAC            | 0.53134   | 0.544      | 0.407      | 0.048      | 0.04     | 0.035    | 0.019    | Iran_N  | Steppe_MLBA | Onge    |
| Namazga_CA      | 0.703087  | 0.588      | 0.412      | NA         | 0.069    | 0.06     | NA       | Iran_N  | Steppe_MLBA | Onge    |
| Indus_Diaspora  | 0.0914973 | 0.305      | 0.378      | 0.316      | 0.064    | 0.056    | 0.03     | Iran_N  | Steppe_MLBA | Onge    |
| Turkmenistan_IA | 0.804688  | 0.307      | 0.648      | 0.045      | 0.072    | 0.066    | 0.035    | Iran_N  | Steppe_MLBA | Onge    |
| IranTuran_BA    | 0.171678  | 0.52       | 0.445      | 0.035      | 0.046    | 0.04     | 0.022    | Iran_N  | Steppe_MLBA | Onge    |

**Table S12. qpAdm with Steppe\_EMBA** we used qpAdm to deduce ancestry proportion from distal ancient sources (Iran\_N, Steppe\_EMBA and Onge) among South Asians. Only populations with p value > 0.5 have been reported leaving out Burusho, Hazara, IN\_AA and IN\_TB (p value < 0.5).

| Target Pop      | p value  | Mix coeff1 | Mix coeff2 | Mix coeff3 | std err1 | std err2 | std err3 | Source1 | Source2     | Source3 |
|-----------------|----------|------------|------------|------------|----------|----------|----------|---------|-------------|---------|
| Ror             | 0.862682 | 0.244      | 0.544      | 0.212      | 0.027    | 0.022    | 0.015    | Iran_N  | Steppe_EMBA | Onge    |
| Kalash          | 0.627904 | 0.228      | 0.583      | 0.189      | 0.031    | 0.026    | 0.017    | Iran_N  | Steppe_EMBA | Onge    |
| Khatri          | 0.185302 | 0.261      | 0.483      | 0.256      | 0.029    | 0.024    | 0.016    | Iran_N  | Steppe_EMBA | Onge    |
| Gujjar          | 0.624598 | 0.269      | 0.429      | 0.302      | 0.03     | 0.025    | 0.017    | Iran_N  | Steppe_EMBA | Onge    |
| Kamboj          | 0.215046 | 0.306      | 0.424      | 0.27       | 0.031    | 0.025    | 0.018    | Iran_N  | Steppe_EMBA | Onge    |
| Pathan          | 0.242626 | 0.3        | 0.476      | 0.225      | 0.029    | 0.023    | 0.016    | Iran_N  | Steppe_EMBA | Onge    |
| Jatt            | 0.380243 | 0.172      | 0.611      | 0.218      | 0.071    | 0.06     | 0.038    | Iran_N  | Steppe_EMBA | Onge    |
| Sindhi          | 0.348933 | 0.532      | 0.263      | 0.205      | 0.037    | 0.03     | 0.02     | Iran_N  | Steppe_EMBA | Onge    |
| Balochi         | 0.726245 | 0.617      | 0.249      | 0.135      | 0.042    | 0.034    | 0.022    | Iran_N  | Steppe_EMBA | Onge    |
| Brahui          | 0.432531 | 0.658      | 0.236      | 0.106      | 0.044    | 0.036    | 0.023    | Iran_N  | Steppe_EMBA | Onge    |
| Makrani         | 0.55936  | 0.947      | 0.053      | NA         | 0.057    | 0.047    | NA       | Iran_N  | Steppe_EMBA | Onge    |
| Brahmin_Guj     | 0.577213 | 0.264      | 0.428      | 0.307      | 0.028    | 0.023    | 0.015    | Iran_N  | Steppe_EMBA | Onge    |
| Gujaratis       | 0.833375 | 0.218      | 0.389      | 0.393      | 0.028    | 0.022    | 0.015    | Iran_N  | Steppe_EMBA | Onge    |
| Brahmins_UP     | 0.487651 | 0.2        | 0.445      | 0.355      | 0.033    | 0.027    | 0.019    | Iran_N  | Steppe_EMBA | Onge    |
| Kshatriya       | 0.693484 | 0.224      | 0.409      | 0.367      | 0.034    | 0.028    | 0.018    | Iran_N  | Steppe_EMBA | Onge    |
| Chamar          | 0.512026 | 0.113      | 0.319      | 0.569      | 0.034    | 0.029    | 0.02     | Iran_N  | Steppe_EMBA | Onge    |
| Kanjars         | 0.956662 | 0.223      | 0.327      | 0.45       | 0.036    | 0.03     | 0.021    | Iran_N  | Steppe_EMBA | Onge    |
| Kurmi           | 0.141331 | 0.155      | 0.433      | 0.411      | 0.068    | 0.058    | 0.04     | Iran_N  | Steppe_EMBA | Onge    |
| Dharkars        | 0.184288 | 0.159      | 0.397      | 0.444      | 0.034    | 0.027    | 0.019    | Iran_N  | Steppe_EMBA | Onge    |
| Muslim          | 0.4431   | 0.158      | 0.39       | 0.453      | 0.04     | 0.033    | 0.022    | Iran_N  | Steppe_EMBA | Onge    |
| Maratha         | 0.779805 | 0.178      | 0.292      | 0.53       | 0.036    | 0.031    | 0.02     | Iran_N  | Steppe_EMBA | Onge    |
| Meena           | 0.497844 | 0.211      | 0.454      | 0.335      | 0.071    | 0.061    | 0.038    | Iran_N  | Steppe_EMBA | Onge    |
| Meghawal        | 0.140849 | 0.221      | 0.298      | 0.481      | 0.075    | 0.06     | 0.041    | Iran_N  | Steppe_EMBA | Onge    |
| Kol             | 0.556904 | 0.114      | 0.353      | 0.533      | 0.031    | 0.026    | 0.017    | Iran_N  | Steppe_EMBA | Onge    |
| Gond            | 0.178967 | NA         | 0.264      | 0.736      | NA       | 0.03     | 0.021    | Iran_N  | Steppe_EMBA | Onge    |
| Kurumba         | 0.75005  | 0.256      | 0.268      | 0.476      | 0.044    | 0.037    | 0.025    | Iran_N  | Steppe_EMBA | Onge    |
| Paniya          | 0.420394 | 0.092      | 0.143      | 0.765      | 0.04     | 0.033    | 0.023    | Iran_N  | Steppe_EMBA | Onge    |
| Irula           | 0.294562 | 0.154      | 0.177      | 0.669      | 0.04     | 0.032    | 0.023    | Iran_N  | Steppe_EMBA | Onge    |
| SPGT            | 0.768161 | 0.271      | 0.496      | 0.233      | 0.027    | 0.022    | 0.015    | Iran_N  | Steppe_EMBA | Onge    |
| SouthAsia_H     | 0.949565 | 0.23       | 0.47       | 0.3        | 0.028    | 0.025    | 0.016    | Iran_N  | Steppe_EMBA | Onge    |
| BMAC            | 0.264358 | 0.599      | 0.348      | 0.053      | 0.04     | 0.033    | 0.021    | Iran_N  | Steppe_EMBA | Onge    |
| Indus_Diaspora  | 0.320086 | 0.336      | 0.341      | 0.323      | 0.058    | 0.049    | 0.03     | Iran_N  | Steppe_EMBA | Onge    |
| Turkmenistan_IA | 0.907793 | 0.383      | 0.567      | 0.05       | 0.067    | 0.06     | 0.036    | Iran_N  | Steppe_EMBA | Onge    |
| IranTuran_BA    | 0.238759 | 0.57       | 0.387      | 0.042      | 0.043    | 0.037    | 0.024    | Iran_N  | Steppe_EMBA | Onge    |
| Namazga_CA      | 0.684163 | 0.64       | 0.36       | NA         | 0.065    | 0.054    | NA       | Iran_N  | Steppe_EMBA | Onge    |

**Table S13. qpAdm with both Steppe\_EMBA and Steppe\_MLBA** we used qpAdm to deduce ancestry proportion from distal ancient sources (Iran\_N, Steppe\_EMBA, Steppe\_MLBA and Onge) among South Asians. Only populations with p value > 0.5 have been reported leaving out Burusho, Hazara, BMAC, IN\_AA and IN\_TB (p value < 0.5).

| Target Pop      | p value   | Mix coeff1 | Mix coeff2 | Mix coeff3 | Mix coeff4 | std err1 | std err2 | std err3 | std err4 | Source1 | Source2     | Source3     | Source4 |
|-----------------|-----------|------------|------------|------------|------------|----------|----------|----------|----------|---------|-------------|-------------|---------|
| Makrani         | 0.554654  | 0.968      | NA         | NA         | 0.032      | 0.067    | NA       | NA       | 0.028    | Iran_N  | Steppe_EMBA | Steppe_MLBA | Onge    |
| Brahui          | 0.484494  | 0.629      | NA         | 0.265      | 0.106      | 0.05     | NA       | 0.122    | 0.02     | Iran_N  | Steppe_EMBA | Steppe_MLBA | Onge    |
| Balochi         | 0.133865  | 0.672      | 0.239      | NA         | 0.089      | 0.045    | 0.099    | NA       | 0.019    | Iran_N  | Steppe_EMBA | Steppe_MLBA | Onge    |
| Sindhi          | 0.426382  | 0.523      | 0.262      | NA         | 0.215      | 0.045    | 0.101    | NA       | 0.019    | Iran_N  | Steppe_EMBA | Steppe_MLBA | Onge    |
| Pathan          | 0.492786  | 0.26       | 0.205      | 0.314      | 0.221      | 0.03     | 0.069    | 0.075    | 0.013    | Iran_N  | Steppe_EMBA | Steppe_MLBA | Onge    |
| Kalash          | 0.599629  | 0.215      | 0.486      | 0.112      | 0.187      | 0.036    | 0.087    | 0.093    | 0.016    | Iran_N  | Steppe_EMBA | Steppe_MLBA | Onge    |
| Ror             | 0.950983  | 0.218      | 0.351      | 0.224      | 0.208      | 0.03     | 0.07     | 0.076    | 0.013    | Iran_N  | Steppe_EMBA | Steppe_MLBA | Onge    |
| Khatri          | 0.236179  | 0.236      | 0.317      | 0.192      | 0.254      | 0.033    | 0.073    | 0.08     | 0.014    | Iran_N  | Steppe_EMBA | Steppe_MLBA | Onge    |
| Gujjar          | 0.616238  | 0.248      | 0.274      | 0.18       | 0.298      | 0.035    | 0.079    | 0.086    | 0.015    | Iran_N  | Steppe_EMBA | Steppe_MLBA | Onge    |
| Kamboj          | 0.235878  | 0.281      | 0.236      | 0.218      | 0.266      | 0.036    | 0.081    | 0.09     | 0.016    | Iran_N  | Steppe_EMBA | Steppe_MLBA | Onge    |
| Jatt            | 0.381769  | 0.163      | 0.554      | 0.066      | 0.217      | 0.085    | 0.201    | 0.218    | 0.036    | Iran_N  | Steppe_EMBA | Steppe_MLBA | Onge    |
| Gujaratis       | 0.917428  | 0.218      | 0.389      | NA         | 0.393      | 0.033    | 0.068    | NA       | 0.014    | Iran_N  | Steppe_EMBA | Steppe_MLBA | Onge    |
| Brahmins_UP     | 0.542499  | 0.21       | 0.446      | NA         | 0.344      | 0.039    | 0.089    | NA       | 0.017    | Iran_N  | Steppe_EMBA | Steppe_MLBA | Onge    |
| Kshatriya       | 0.783016  | 0.23       | 0.409      | NA         | 0.361      | 0.04     | 0.09     | NA       | 0.017    | Iran_N  | Steppe_EMBA | Steppe_MLBA | Onge    |
| Chamar          | 0.620047  | 0.107      | 0.317      | NA         | 0.577      | 0.041    | 0.101    | NA       | 0.018    | Iran_N  | Steppe_EMBA | Steppe_MLBA | Onge    |
| Dharkars        | 0.268219  | 0.153      | 0.396      | NA         | 0.45       | 0.042    | 0.093    | NA       | 0.018    | Iran_N  | Steppe_EMBA | Steppe_MLBA | Onge    |
| Muslim          | 0.476656  | 0.17       | 0.392      | NA         | 0.438      | 0.047    | 0.103    | NA       | 0.02     | Iran_N  | Steppe_EMBA | Steppe_MLBA | Onge    |
| Maratha         | 0.875488  | 0.181      | 0.292      | NA         | 0.526      | 0.044    | 0.102    | NA       | 0.019    | Iran_N  | Steppe_EMBA | Steppe_MLBA | Onge    |
| Meena           | 0.638788  | 0.215      | 0.455      | NA         | 0.33       | 0.081    | 0.198    | NA       | 0.034    | Iran_N  | Steppe_EMBA | Steppe_MLBA | Onge    |
| Meghawal        | 0.181145  | 0.245      | 0.3        | NA         | 0.455      | 0.094    | 0.211    | NA       | 0.04     | Iran_N  | Steppe_EMBA | Steppe_MLBA | Onge    |
| Kol             | 0.697869  | 0.115      | 0.353      | NA         | 0.532      | 0.037    | 0.085    | NA       | 0.016    | Iran_N  | Steppe_EMBA | Steppe_MLBA | Onge    |
| Gond            | 0.217194  | NA         | 0.253      | NA         | 0.747      | NA       | 0.102    | NA       | 0.02     | Iran_N  | Steppe_EMBA | Steppe_MLBA | Onge    |
| Kurumba         | 0.777743  | 0.243      | 0.266      | NA         | 0.491      | 0.052    | 0.125    | NA       | 0.023    | Iran_N  | Steppe_EMBA | Steppe_MLBA | Onge    |
| Paniya          | 0.561081  | 0.094      | 0.144      | NA         | 0.762      | 0.049    | 0.113    | NA       | 0.022    | Iran_N  | Steppe_EMBA | Steppe_MLBA | Onge    |
| Irula           | 0.295332  | 0.134      | 0.176      | NA         | 0.69       | 0.049    | 0.106    | NA       | 0.021    | Iran_N  | Steppe_EMBA | Steppe_MLBA | Onge    |
| Namazga_CA      | 0.762098  | 0.642      | 0.358      | NA         | NA         | 0.079    | 0.196    | NA       | NA       | Iran_N  | Steppe_EMBA | Steppe_MLBA | Onge    |
| Indus_Diaspora  | 0.386398  | 0.354      | 0.34       | NA         | 0.306      | 0.071    | 0.169    | NA       | 0.027    | Iran_N  | Steppe_EMBA | Steppe_MLBA | Onge    |
| SPGT            | 0.177337  | 0.238      | 0.18       | 0.363      | 0.219      | 0.031    | 0.074    | 0.083    | 0.013    | Iran_N  | Steppe_EMBA | Steppe_MLBA | Onge    |
| SouthAsia_H     | 0.884903  | 0.185      | 0.144      | 0.381      | 0.291      | 0.032    | 0.08     | 0.088    | 0.014    | Iran_N  | Steppe_EMBA | Steppe_MLBA | Onge    |
| IranTuran_BA    | 0.0543647 | 0.531      | NA         | 0.469      | NA         | 0.051    | NA       | 0.14     | NA       | Iran_N  | Steppe_EMBA | Steppe_MLBA | Onge    |
| Turkmenistan_IA | 0.765259  | 0.334      | NA         | 0.666      | NA         | 0.08     | NA       | 0.234    | NA       | Iran_N  | Steppe_EMBA | Steppe_MLBA | Onge    |

**Table S14. *qpAdm* using proximal model with Namazga\_CA** we used *qpAdm* to deduce ancestry proportion from distal ancient sources (Namazga\_CA, Steppe\_MLBA and Onge) among South Asians. Only populations with p value > 0.5 have been reported.

| Target pop  | p value | Mix coeff1 | Mix coeff2   | Mix coeff3 | std err1 | std err2 | std err3 | Source1    | Source2     | Source3 |
|-------------|---------|------------|--------------|------------|----------|----------|----------|------------|-------------|---------|
| Ror         | 0.1103  | 0.388      | <b>0.436</b> | 0.176      | 0.103    | 0.066    | 0.042    | Namazga_CA | Steppe_MLBA | Onge    |
| Khatri      | 0.1128  | 0.578      | 0.244        | 0.178      | 0.078    | 0.047    | 0.038    | Namazga_CA | Steppe_MLBA | Onge    |
| Gujjar      | 0.4164  | 0.529      | 0.244        | 0.227      | 0.079    | 0.048    | 0.039    | Namazga_CA | Steppe_MLBA | Onge    |
| Kamboj      | 0.1433  | 0.54       | 0.243        | 0.217      | 0.093    | 0.055    | 0.045    | Namazga_CA | Steppe_MLBA | Onge    |
| Pathan      | 0.608   | 0.589      | 0.239        | 0.172      | 0.071    | 0.045    | 0.033    | Namazga_CA | Steppe_MLBA | Onge    |
| Sindhi      | 0.9338  | 0.58       | 0.218        | 0.202      | 0.066    | 0.042    | 0.031    | Namazga_CA | Steppe_MLBA | Onge    |
| Brahui      | 0.1223  | 0.699      | 0.179        | 0.122      | 0.072    | 0.049    | 0.031    | Namazga_CA | Steppe_MLBA | Onge    |
| Brahmins_UP | 0.054   | 0.309      | 0.335        | 0.356      | 0.146    | 0.08     | 0.072    | Namazga_CA | Steppe_MLBA | Onge    |
| Chamar      | 0.0996  | 0.122      | 0.268        | 0.61       | 0.087    | 0.054    | 0.048    | Namazga_CA | Steppe_MLBA | Onge    |
| Kanjars     | 0.0865  | 0.262      | 0.289        | 0.449      | 0.123    | 0.067    | 0.065    | Namazga_CA | Steppe_MLBA | Onge    |
| Kurmi       | 0.4326  | 0.588      | 0.131        | 0.281      | 0.201    | 0.103    | 0.116    | Namazga_CA | Steppe_MLBA | Onge    |
| Maratha     | 0.3011  | 0.135      | 0.308        | 0.557      | 0.095    | 0.059    | 0.051    | Namazga_CA | Steppe_MLBA | Onge    |
| Meena       | 0.8675  | 0.333      | 0.301        | 0.365      | 0.191    | 0.114    | 0.098    | Namazga_CA | Steppe_MLBA | Onge    |
| Meghawal    | 0.2495  | NA         | 0.288        | 0.712      | NA       | 0.099    | 0.115    | Namazga_CA | Steppe_MLBA | Onge    |
| Gond        | 0.2566  | NA         | 0.183        | 0.817      | NA       | 0.047    | 0.047    | Namazga_CA | Steppe_MLBA | Onge    |
| Kurumba     | 0.0888  | 0.246      | 0.234        | 0.52       | 0.125    | 0.068    | 0.073    | Namazga_CA | Steppe_MLBA | Onge    |
| Paniya      | 0.3473  | NA         | 0.185        | 0.815      | NA       | 0.052    | 0.049    | Namazga_CA | Steppe_MLBA | Onge    |
| Irula       | 0.5916  | 0.129      | 0.159        | 0.713      | 0.076    | 0.048    | 0.047    | Namazga_CA | Steppe_MLBA | Onge    |
| Ho          | 0.0701  | NA         | 0.111        | 0.889      | NA       | 0.045    | 0.048    | Namazga_CA | Steppe_MLBA | Onge    |
| Asur        | 0.3203  | NA         | NA           | 1          | NA       | NA       | 0.072    | Namazga_CA | Steppe_MLBA | Onge    |
| Juang       | 0.1246  | NA         | NA           | 1          | NA       | NA       | 0.079    | Namazga_CA | Steppe_MLBA | Onge    |
| SouthAsia_H | 0.5284  | 0.644      | 0.159        | 0.197      | 0.076    | 0.047    | 0.038    | Namazga_CA | Steppe_MLBA | Onge    |

**Table S15. *qpAdm* using proximal model with Indus\_Periphery (Indus\_Diaspora) we used *qpAdm* to deduce ancestry proportion from distal ancient sources (Indus\_Diaspora, Steppe\_MLBA and Onge) among South Asians. Only populations with p value > 0.5 have been reported.**

| Target pop  | p value  | Mix coeff1 | Mix coeff2 | Mix coeff3 | std err1 | std err2 | std err3 | Source1        | Source2     | Source3 |
|-------------|----------|------------|------------|------------|----------|----------|----------|----------------|-------------|---------|
| Ror         | 0.641608 | 0.468      | 0.473      | 0.059      | 0.092    | 0.056    | 0.04     | Indus_Diaspora | Steppe_MLBA | Onge    |
| Kalash      | 0.386132 | 0.555      | 0.445      | NA         | 0.129    | 0.078    | NA       | Indus_Diaspora | Steppe_MLBA | Onge    |
| Khatri      | 0.072829 | 0.765      | 0.235      | NA         | 0.13     | 0.078    | NA       | Indus_Diaspora | Steppe_MLBA | Onge    |
| Gujjar      | 0.148636 | 0.717      | 0.214      | 0.069      | 0.131    | 0.08     | 0.056    | Indus_Diaspora | Steppe_MLBA | Onge    |
| Kamboj      | 0.130149 | 0.85       | 0.15       | NA         | 0.134    | 0.081    | NA       | Indus_Diaspora | Steppe_MLBA | Onge    |
| Pathan      | 0.076498 | 0.71       | 0.29       | NA         | 0.12     | 0.073    | NA       | Indus_Diaspora | Steppe_MLBA | Onge    |
| Jatt        | 0.37967  | 0.601      | 0.399      | NA         | 0.232    | 0.14     | NA       | Indus_Diaspora | Steppe_MLBA | Onge    |
| Brahmin_Guj | 0.138981 | 0.675      | 0.234      | 0.091      | 0.129    | 0.078    | 0.055    | Indus_Diaspora | Steppe_MLBA | Onge    |
| Gujaratis   | 0.61345  | 0.56       | 0.214      | 0.226      | 0.109    | 0.065    | 0.047    | Indus_Diaspora | Steppe_MLBA | Onge    |
| Brahmins_UP | 0.456242 | 0.429      | 0.34       | 0.23       | 0.141    | 0.083    | 0.062    | Indus_Diaspora | Steppe_MLBA | Onge    |
| Kshatriya   | 0.90496  | 0.553      | 0.247      | 0.2        | 0.123    | 0.074    | 0.054    | Indus_Diaspora | Steppe_MLBA | Onge    |
| Chamar      | 0.261509 | 0.307      | 0.218      | 0.475      | 0.167    | 0.097    | 0.072    | Indus_Diaspora | Steppe_MLBA | Onge    |
| Kanjars     | 0.518784 | 0.608      | 0.143      | 0.249      | 0.152    | 0.091    | 0.066    | Indus_Diaspora | Steppe_MLBA | Onge    |
| Kurmi       | 0.425804 | 0.199      | 0.385      | 0.416      | 0.269    | 0.161    | 0.115    | Indus_Diaspora | Steppe_MLBA | Onge    |
| Dharkars    | 0.165794 | 0.25       | 0.351      | 0.399      | 0.155    | 0.091    | 0.067    | Indus_Diaspora | Steppe_MLBA | Onge    |
| Muslim      | 0.662533 | 0.428      | 0.232      | 0.341      | 0.15     | 0.088    | 0.065    | Indus_Diaspora | Steppe_MLBA | Onge    |
| Maratha     | 0.742817 | 0.473      | 0.149      | 0.378      | 0.149    | 0.089    | 0.063    | Indus_Diaspora | Steppe_MLBA | Onge    |
| Meena       | 0.324146 | 0.445      | 0.313      | 0.242      | 0.304    | 0.182    | 0.128    | Indus_Diaspora | Steppe_MLBA | Onge    |
| Meghawal    | 0.555112 | 0.855      | NA         | 0.146      | 0.285    | NA       | 0.122    | Indus_Diaspora | Steppe_MLBA | Onge    |
| Kol         | 0.621467 | 0.256      | 0.267      | 0.477      | 0.123    | 0.073    | 0.053    | Indus_Diaspora | Steppe_MLBA | Onge    |
| Kurumba     | 0.688289 | 0.801      | NA         | 0.199      | 0.179    | NA       | 0.077    | Indus_Diaspora | Steppe_MLBA | Onge    |
| Paniya      | 0.74176  | 0.389      | NA         | 0.611      | 0.171    | NA       | 0.075    | Indus_Diaspora | Steppe_MLBA | Onge    |
| Irula       | 0.869405 | 0.476      | NA         | 0.524      | 0.157    | NA       | 0.068    | Indus_Diaspora | Steppe_MLBA | Onge    |
| SPGT        | 0.8029   | 0.616      | 0.338      | 0.046      | 0.098    | 0.06     | 0.042    | Indus_Diaspora | Steppe_MLBA | Onge    |
| SouthAsia_H | 0.710365 | 0.469      | 0.363      | 0.168      | 0.105    | 0.063    | 0.045    | Indus_Diaspora | Steppe_MLBA | Onge    |



**Table S16. qpWave results**

**(A): qpWave p value for all models** we used qpWave for various modellings of South Asian populations indicating the differentiation of sources by the listed outgroups.

| p value   | f4 rank | source1        | source2     | source3 | source4     | Outgrp1   | Outgrp2 | Outgrp3    | Outgrp4        | Outgrp5  | Outgrp6   | Outgrp7       | Outgrp8    |                 |
|-----------|---------|----------------|-------------|---------|-------------|-----------|---------|------------|----------------|----------|-----------|---------------|------------|-----------------|
| 4.13E-44  | 1       | Iran_N         | Steppe_MLBA | Onge    | NA          | Ust_Ishim | MA1     | Kostenki14 | Papuans        | Chukchis | Karitiana | Mbuti_Pygmies | NA         | distal model1   |
| 7.60E-52  | 1       | Iran_N         | Steppe_EMBA | Onge    | NA          | Ust_Ishim | MA1     | Kostenki14 | Papuans        | Chukchis | Karitiana | Mbuti_Pygmies | NA         | distal model2   |
| 2.52E-25  | 2       | Iran_N         | Steppe_MLBA | Onge    | Steppe_EMBA | Ust_Ishim | MA1     | Kostenki14 | Papuans        | Chukchis | Karitiana | Mbuti_Pygmies | Anatolia_N | distal model3   |
| 3.956E-10 | 1       | Namazga_CA     | Steppe_MLBA | Onge    | NA          | Ust_Ishim | MA1     | Kostenki14 | Switzerland_HG | Clovis   | Natufian  | NA            | NA         | proximal mode2  |
| 1.899E-08 | 1       | Indus_Diaspora | Steppe_MLBA | Onge    | NA          | Ust_Ishim | MA1     | Kostenki14 | Dai            | Chukchis | Karitiana | Mbuti_Pygmies | NA         | proximal model2 |

**(B): Differentiation of Iran\_N, Steppe\_EMBA or Steppe\_MLBA and Onge** the Outgroups (Ust\_Ishim, MA1, Kostenki14, Papuans, Chukchis, Karitiana and Mbuti\_Pygmies) could significantly distinguish the reference sources ( $p < 0.0001$ ).

| f4rank: | p-value  | Sources                   |
|---------|----------|---------------------------|
| 0       | 3.01E-70 | Iran_N, Steppe_EMBA       |
| 1       | 7.60E-52 | Iran_N, Steppe_EMBA, Onge |

| f4rank: | p-value  | Sources                   |
|---------|----------|---------------------------|
| 0       | 1.03E-55 | Iran_N, Steppe_MLBA       |
| 1       | 4.13E-44 | Iran_N, Steppe_MLBA, Onge |

**(C): Differentiation of Iran\_N, Steppe\_EMBA, Steppe\_MLBA and Onge** the Outgroups (Ust\_Ishim, MA1, Kostenki14, Papuans, Chukchis, Karitiana, Mbuti\_Pygmies and Anatolia\_N) could distinguish the reference sources ( $p < 0.0001$ ).

| f4rank: | p-value  | Sources                                |
|---------|----------|----------------------------------------|
| 0       | 2.63E-69 | Iran_N, Steppe_EMBA                    |
| 1       | 7.22E-64 | Iran_N, Steppe_EMBA, Steppe_MLBA       |
| 2       | 2.52E-25 | Iran_N, Steppe_EMBA, Steppe_MLBA, Onge |

**Table S17. Cross-validation for the unbiasedness due to varying sample sizes**

**(A): *D* statistics** we applied *D* statistics and *qpAdm* using equal number (52 each) of individuals from Steppe\_EMBA and Steppe\_MLBA to cross-verify if there is any biasedness in results due to different sample sizes for ancient sources like Steppe\_EMBA and Steppe\_MLBA in our earlier analyses and observed there is negligible deviation.

| pop1        | Yoruba  | pop2           | pop3        | Dstat     | Z score |
|-------------|---------|----------------|-------------|-----------|---------|
| Ror         | Yorubas | Steppe_EMBA    | Steppe_MLBA | 0.00061   | 5.342   |
| Jatt        | Yorubas | Steppe_EMBA    | Steppe_MLBA | 0.00062   | 3.096   |
| Gujjar      | Yorubas | Steppe_EMBA    | Steppe_MLBA | 0.000759  | 6.632   |
| Kamboj      | Yorubas | Steppe_EMBA    | Steppe_MLBA | 0.000587  | 5.152   |
| Khatri      | Yorubas | Steppe_EMBA    | Steppe_MLBA | 0.000748  | 6.88    |
| Pathan      | Yorubas | Steppe_EMBA    | Steppe_MLBA | 0.000686  | 6.316   |
| Kalash      | Yorubas | Steppe_EMBA    | Steppe_MLBA | 0.000932  | 7.818   |
| Sindhi      | Yorubas | Steppe_EMBA    | Steppe_MLBA | 0.000742  | 6.927   |
| Brahmins_UP | Yorubas | Steppe_EMBA    | Steppe_MLBA | 0.000645  | 5.582   |
| Kshatriya   | Yorubas | Steppe_EMBA    | Steppe_MLBA | 0.000635  | 5.417   |
| Chamar      | Yorubas | Steppe_EMBA    | Steppe_MLBA | 0.000467  | 3.982   |
| Gujaratis   | Yorubas | Steppe_EMBA    | Steppe_MLBA | 0.000684  | 6.424   |
| Paniya      | Yorubas | Steppe_EMBA    | Steppe_MLBA | 0.000234  | 1.934   |
| Ho          | Yorubas | Steppe_EMBA    | Steppe_MLBA | 0.000111  | 0.997   |
| Ror         | Yorubas | Indus_Diaspora | Steppe_MLBA | -0.002219 | -8.358  |
| Jatt        | Yorubas | Indus_Diaspora | Steppe_MLBA | -0.001881 | -3.822  |
| Gujjar      | Yorubas | Indus_Diaspora | Steppe_MLBA | 0.000049  | 0.178   |
| Kamboj      | Yorubas | Indus_Diaspora | Steppe_MLBA | -0.000398 | -1.405  |
| Khatri      | Yorubas | Indus_Diaspora | Steppe_MLBA | -0.000677 | -2.532  |
| Kalash      | Yorubas | Indus_Diaspora | Steppe_MLBA | -0.001623 | -5.53   |
| Pathan      | Yorubas | Indus_Diaspora | Steppe_MLBA | -0.001304 | -4.947  |
| Sindhi      | Yorubas | Indus_Diaspora | Steppe_MLBA | -0.000133 | -0.518  |
| Brahmins_UP | Yorubas | Indus_Diaspora | Steppe_MLBA | 0.000662  | 2.216   |
| Kshatriya   | Yorubas | Indus_Diaspora | Steppe_MLBA | 0.000659  | 2.309   |
| Chamar      | Yorubas | Indus_Diaspora | Steppe_MLBA | 0.003119  | 10.797  |
| Gujaratis   | Yorubas | Indus_Diaspora | Steppe_MLBA | 0.00163   | 6.436   |
| Paniya      | Yorubas | Indus_Diaspora | Steppe_MLBA | 0.003746  | 12.544  |
| Ho          | Yorubas | Indus_Diaspora | Steppe_MLBA | 0.003761  | 13.317  |

**(B): qpAdm** we applied *qpAdm* for same number (52 each) of individuals from Steppe\_EMBA and Steppe\_MLBA to cross-verify if there is any biasedness in results due to different sample sizes for ancient sources like Steppe\_EMBA and Steppe\_MLBA in our earlier analyses and observed there is no significant deviation.

| Target Pop  | p value  | Mix coeff1 | Mix coeff2 | Mix coeff3 | Mix coeff4 | std err1 | std err2 | std err3 | std err4 | Source1 | Source2     | Source3     | Source4 |
|-------------|----------|------------|------------|------------|------------|----------|----------|----------|----------|---------|-------------|-------------|---------|
| Ror         | 0.942223 | 0.226      | 0.355      | 0.214      | 0.205      | 0.029    | 0.073    | 0.081    | 0.012    | Iran_N  | Steppe_EMBA | Steppe_MLBA | Onge    |
| Khatri      | 0.29553  | 0.24       | 0.303      | 0.205      | 0.252      | 0.032    | 0.076    | 0.084    | 0.013    | Iran_N  | Steppe_EMBA | Steppe_MLBA | Onge    |
| Gujjar      | 0.673977 | 0.253      | 0.274      | 0.177      | 0.297      | 0.034    | 0.084    | 0.093    | 0.014    | Iran_N  | Steppe_EMBA | Steppe_MLBA | Onge    |
| Kamboj      | 0.257426 | 0.288      | 0.242      | 0.205      | 0.265      | 0.034    | 0.086    | 0.095    | 0.015    | Iran_N  | Steppe_EMBA | Steppe_MLBA | Onge    |
| Jatt        | 0.537537 | 0.178      | 0.61       | 0          | 0.213      | 0.082    | 0.21     | NA       | 0.033    | Iran_N  | Steppe_EMBA | Steppe_MLBA | Onge    |
| Pathan      | 0.532103 | 0.271      | 0.207      | 0.305      | 0.217      | 0.03     | 0.073    | 0.08     | 0.012    | Iran_N  | Steppe_EMBA | Steppe_MLBA | Onge    |
| Kalash      | 0.63285  | 0.22       | 0.496      | 0.098      | 0.186      | 0.035    | 0.09     | 0.098    | 0.015    | Iran_N  | Steppe_EMBA | Steppe_MLBA | Onge    |
| Sindhi      | 0.263567 | 0.51       | 0.264      | 0          | 0.226      | 0.044    | 0.108    | NA       | 0.017    | Iran_N  | Steppe_EMBA | Steppe_MLBA | Onge    |
| Gujaratis   | 0.916619 | 0.216      | 0.39       | 0          | 0.395      | 0.032    | 0.072    | NA       | 0.013    | Iran_N  | Steppe_EMBA | Steppe_MLBA | Onge    |
| Brahmins_UP | 0.580855 | 0.208      | 0.446      | 0          | 0.346      | 0.037    | 0.091    | NA       | 0.016    | Iran_N  | Steppe_EMBA | Steppe_MLBA | Onge    |
| Balochi     | 0.244612 | 0.668      | 0.236      | 0          | 0.096      | 0.045    | 0.107    | NA       | 0.018    | Iran_N  | Steppe_EMBA | Steppe_MLBA | Onge    |

**Table S18. ALDER dating for admixture in Northwest Indians** we estimated the Admixture dates in newly sampled Northwest Indians using ALDER, results reveal admixture at around 1500 years ago in the Ror, quite recent admixture event in Gujjar and the very old event in Kamboj. We used 30 years per generation (gens) to convert dates in generations to years.

| Test status | p-value | test pop | ref A   | ref B          | Z-score | Admixture Date (gens) |
|-------------|---------|----------|---------|----------------|---------|-----------------------|
| success     | 0.0075  | Ror      | Asur    | French         | 4.37    | 43.68 +/- 8.59        |
| success     | 5.6E-07 | Ror      | Kol     | French         | 6.12    | 48.69 +/- 7.42        |
| success     | 7.6E-07 | Ror      | Ho      | French         | 6.07    | 46.72 +/- 7.44        |
| success     | 0.0017  | Ror      | Tharu   | French         | 4.68    | 42.36 +/- 7.62        |
| success     | 6.2E-05 | Ror      | Santhal | French         | 5.32    | 54.17 +/- 9.43        |
| success     | 6.3E-05 | Ror      | Gond    | French         | 5.32    | 59.56 +/- 10.02       |
| success     | 9.3E-05 | Ror      | Kol     | Germans        | 5.24    | 49.70 +/- 8.50        |
| success     | 3.9E-05 | Ror      | Ho      | Germans        | 5.4     | 49.06 +/- 8.47        |
| success     | 0.0011  | Ror      | Tharu   | Germans        | 4.78    | 40.12 +/- 7.67        |
| success     | 0.015   | Ror      | Santhal | Germans        | 4.21    | 54.27 +/- 11.40       |
| success     | 0.00023 | Ror      | Gond    | Germans        | 5.08    | 63.09 +/- 9.79        |
| success     | 0.0057  | Gujjar   | Asur    | Swedes         | 4.43    | 15.04 +/- 3.40        |
| success     | 0.028   | Gujjar   | Asur    | Germans        | 4.07    | 13.20 +/- 3.24        |
| success     | 0.0046  | Kamboj   | Asur    | Estonians      | 4.47    | 144.23 +/- 22.54      |
| success     | 0.008   | Kamboj   | Asur    | North_Italians | 4.35    | 130.33 +/- 20.26      |
| success     | 0.0019  | Kamboj   | Asur    | Swedes         | 4.66    | 148.00 +/- 23.06      |
| success     | 0.044   | Kamboj   | Asur    | Ukrainians     | 3.97    | 147.76 +/- 22.30      |
| success     | 0.017   | Kamboj   | Swedes  | UP_Low_Caste   | 4.19    | 79.99 +/- 19.09       |

**Table S19. standard error for NLS with jack-knife method****(A): All populations as donor**

|             | <b>Eur</b> | <b>Cau</b> | <b>MEast</b> | <b>IN_IE</b> | <b>IN_DRA</b> | <b>Iran</b> | <b>CAsia</b> |
|-------------|------------|------------|--------------|--------------|---------------|-------------|--------------|
| Ror         | 0.0066     | 0          | 0.0015       | 0.0092       | 0.0008        | 0.0213      | 0.0025       |
| Kamboj      | 0.0038     | 0.004      | 0.0063       | 0.2039       | 0             | 0.0608      | 0.0071       |
| Jatt        | 0.0051     | 0.0049     | 0.0019       | 0.0176       | 0.0034        | 0.0535      | 0.006        |
| Khatri      | 0          | 0          | 0.004        | 0.0012       | 0             | 0.0307      | 0.0023       |
| Gujjar      | 0          | 0          | 0            | 0.0255       | 0.0056        | 0.0147      | 0            |
| Gujaratis   | 0          | 0          | 0            | 0.1634       | 0             | 0           | 0            |
| Brahmins_UP | 0.001      | 0.0027     | 0.0006       | 0.0298       | 0.0011        | 0.0126      | 0.0005       |
| Kshatriya   | 7E-05      | 0.0031     | 0.0005       | 0.0409       | 0.0012        | 0.0035      | 0            |
| Pathan      | 0.0004     | 0.0014     | 0.0021       | 0.0264       | 0.0011        | 0.0141      | 0.0037       |

**(B): Without PNWI as donor**

|             | <b>Eur</b> | <b>Cau</b> | <b>MEast</b> | <b>IN_IE</b> | <b>IN_DRA</b> | <b>Iran</b> | <b>CAsia</b> |
|-------------|------------|------------|--------------|--------------|---------------|-------------|--------------|
| Ror         | 0.0385     | 0.0153     | 0.0064       | 0.0302       | 0.0081        | 0           | 0.0042       |
| Kamboj      | 0.0121     | 0.0582     | 0.0184       | 0.0266       | 0.0093        | 0.061       | 0.0059       |
| Jatt        | 0.0331     | 0.0325     | 0.0064       | 0.0276       | 0.0036        | 0.043       | 0.0098       |
| Khatri      | 0.0086     | 0.0717     | 0.0281       | 0.0797       | 0.0087        | 0.0768      | 0.0136       |
| Gujjar      | 0.0054     | 0.0056     | 0.0001       | 0.0413       | 0.0044        | 0           | 0            |
| Gujaratis   | 0          | 0          | 0            | 0.0704       | 0             | 0           | 0            |
| Brahmins_UP | 0.0145     | 0.0031     | 0.003        | 0.03         | 0.0053        | 0           | 0.0009       |
| Kshatriya   | 0.0037     | 0.0022     | 0.0004       | 0.0537       | 0.0027        | 0           | 0            |
| Pathan      | 0.0115     | 0.1609     | 0.0132       | 0.0392       | 0.0044        | 0.248       | 0.0196       |

**(C): UNLINKED model**

|             | <b>Eur</b> | <b>Cau</b> | <b>MEast</b> | <b>IN_IE</b> | <b>IN_DRA</b> | <b>Iran</b> | <b>CAsia</b> |
|-------------|------------|------------|--------------|--------------|---------------|-------------|--------------|
| Ror         | 0.0436     | 0.0182     | 0.0044       | 0.0383       | 0.0192        | 0           | 0.0107       |
| Kamboj      | 0.0345     | 0.0157     | 0.0116       | 0.041        | 0.0318        | 0.0037      | 0.0063       |
| Jatt        | 0.0846     | 0.0398     | 0.0075       | 0.0811       | 0.0481        | 0           | 0.0112       |
| Khatri      | 0.0328     | 0.0133     | 0.0039       | 0.0398       | 0.0242        | 0.0038      | 0.0085       |
| Gujjar      | 0.0114     | 0.0165     | 0.004        | 0.0468       | 0.0324        | 0.0052      | 0.0097       |
| Gujaratis   | 0.0354     | 0.0106     | 0.0083       | 0.0314       | 0.0641        | 0           | 0.0056       |
| Brahmins_UP | 0.0349     | 0.0198     | 0.0056       | 0.0587       | 0.0541        | 0.0021      | 0.0063       |
| Kshatriya   | 0.0254     | 0.0174     | 0.005        | 0.0631       | 0.0543        | 0.0038      | 0.0089       |
| Pathan      | 0.0317     | 0.0177     | 0.0036       | 0.0406       | 0.0184        | 0.0026      | 0.0064       |

## References:

1. Kenoyer, J.M. (1998). Kenoyer, J. M. *Ancient Cities of the Indus Valley Civilization*. (Oxford University, Oxford, 1998).
2. Possehl, G.L. (2002). Possehl, G. L. *The Indus Civilisation: A Contemporary Perspective*. (AltaMira, Lanham, MD, 2002).
3. Wright, R.P. (2010). *The ancient Indus: urbanism, economy, and society*.
4. Kenoyer, J.M. (2008). Kenoyer, J. M. in *The Ancient City: New Perspectives in the Old and New World* (eds J. Marcus & J. A. Sablof) 85–109 (SAR, Santa Fe, NM, 2008).
5. Lawler, A. (2008). Boring no more, a trade-savvy Indus emerges. *Science* 320, 1276–1281.
6. Joseph, T. (2017). Who built the Indus Valley civilisation? *The Hindu*.
7. Giosan, L., Clift, P.D., Macklin, M.G., Fuller, D.Q., Constantinescu, S., Durcan, J.A., Stevens, T., Duller, G.A.T., Tabrez, A.R., Gangal, K., et al. (2012). Fluvial landscapes of the Harappan civilization. *Proc. Natl. Acad. Sci.* 109, E1688–E1694.
8. Giosan, L., Fuller, D.Q., Nicoll, K., Flad, R.K., and Clift, P.D. (2013). *Climates, Landscapes, and Civilizations*. (Washington: Wiley).
9. Gangal, K., Vahia, M.N., and Adhikari, R. (2010). Spatio-temporal analysis of the Indus urbanization. *Curr. Sci.* 00113891 98, 846–852.
10. McIntosh, J. (2008). *The ancient Indus Valley: new perspectives* (Santa Barbara, Calif: ABC-CLIO).
11. Petrie, C.A. (2013). Petrie, C. A. in *Oxford Handbook of Cities in History* (ed P. Clark) 139–173 (Oxford University Press, Oxford, 2013). *Oxf. Univ. Press* 130–173.
12. Beck, R.B. (1999). *McDougal Littell world history: patterns of interaction* (Evanston, Ill.: McDougal Littell).
13. Jarrige, J.-F. (1986). Excavations at Mehrgarh-Nausharo. *Pak. Archaeol.* 10, 63–131.
14. Jarrige, J.F. (2006). Mehrgarh Neolithic, Pragdhara No. 18.
15. Gallego Romero, I., Basu Mallick, C., Liebert, A., Crivellaro, F., Chaubey, G., Itan, Y., Metspalu, M., Eaaswarkhanth, M., Pitchappan, R., Villems, R., et al. (2012). Herders of Indian and European Cattle Share Their Predominant Allele for Lactase Persistence. *Mol. Biol. Evol.* 29, 249–260.
16. Dixit, Y., Hodell, D.A., and Petrie, C.A. (2014). Abrupt weakening of the summer monsoon in northwest India~ 4100 yr ago. *Geology* 42, 339–342.
17. Allchin, B., and Allchin, F.R. (1997). *Origins of a civilization: the prehistory and early archaeology of South Asia* (Viking Adult).
18. Gangal, K., Sarson, G.R., and Shukurov, A. (2014). The Near-Eastern Roots of the Neolithic in South Asia. *PLOS ONE* 9, e95714.
19. Beck, R.B., and Beck, R.B. (2005). *World history: Patterns of interaction* (McDougal Littell Evanston, IL).

20. Tripathi, J.K., Bock, B., Rajamani, V., and Eisenhauer, A. (2004). Is Rhiver Ghaggar, Saraswati? Geochemical constraints. *Curr. Sci.* 87, 1141–1144.
21. Gupta, A.K., Anderson, D.M., Pandey, D.N., and Singhvi, A.K. (2006). Adaptation and human migration, and evidence of agriculture coincident with changes in the Indian summer monsoon during the Holocene. *Curr. Sci.-BANGALORE-* 90, 1082.
22. MacDonald, G. (2011). Potential influence of the Pacific Ocean on the Indian summer monsoon and Harappan decline. *Quat. Int.* 229, 140–148.
23. Singh, G. (1971). The Indus valley culture. *Archaeol. Ocean.* 6, 177–189.
24. Wright, R.P., Bryson, R.A., and Schuldenrein, J. (2008). Water supply and history: Harappa and the Beas regional survey. *Antiquity* 82, 37–48.
25. Madella, M., and Fuller, D.Q. (2006). Palaeoecology and the Harappan Civilisation of South Asia: a reconsideration. *Quat. Sci. Rev.* 25, 1283–1301.
26. rorraja.com History Of Ror Community | Ror Employees Association.
27. Rose, H.A., and Asian Educational Services (1990). A glossary of the tribes and castes of the Punjab and North-West Frontier Province. Vol. 2, Vol. 2, (New Delhi: Asian Educational Services).
28. Beglar, J.D., Carlleyle, A.C.L., and Cunningham, S.A. (1994). Report for the Year 1871-72. Delhi (Rahul Publishing House).
29. rormahasabha.org Ror Community | About Us.
30. Davids, T.W.R. (1903). *Buddhist India*, by TW Rhys Davids (Putnam; London).
31. Elliott, H.M. (1859). *Memoirs on the History, Folk-Lore, and Distribution of the Races of the North Western Provinces of India*. Lond. Trübner.
32. Elliot, H.M. (1869). *Memoirs on the History, Folk-Lore, and Distribution of the Races of the North Western Provinces of India; being an amplified Edition of the original: Supplemental Glossary of India Terms By the late Henry M. Elliot*. Edited, revised, and re-arranged by John Beames. In 2 Volumes. II (Trübner & Company).
33. peoplegroupsindia.com Gujjar – People Groups of India.
34. (2001). *Encyclopaedia of the world Muslims: tribes, castes and communities* (Delhi: Global Vision Pub. House).
35. (2011). *Culture, institutions, and development: new insights into an old debate* (New York: Routledge).
36. Bose, S.K. (2015). *Boots, hooves, and wheels: and the social dynamics behind South Asian warfare* (New Delhi, India: Vij Books India Pvt. Ltd).
37. Cunningham, A. (1871). *Four Reports Made During the Years, 1862-63-64-65* (Printed at the Government Central Press).
38. Smith, V.A. (1924). *The Early History of India, from 600 BC to the Muhammadan Conquest including the Invasion of Alexander the Great*. revised by SM Edwardes (Oxford at the Clarendon Press (first published in 1914)).
39. Khatra, P.S., and Sharma, V. (1992). Socio-economic issues in the development of nomadic Gujjars. *Indian J. Agric. Econ.* 47, 448–449.

40. Singh, D.E. (2012). *Islamization in Modern South Asia: Deobandi Reform and the Gujjar Response* (Walter de Gruyter).
41. Agrawal, S.P., and Aggarwal, J.C. (1991). *Educational and social uplift of backward classes: at what cost and how?: Mandal Commission and after* (New Delhi: Concept Pub. Co).
42. Chand, P. (1990). *Indian archers Dhanushkas as Sanskrit literature depicts with a special reference to the Dhanaka family matrimonially connected with the Ikshvaku kings Andhradesa 200 625 AD.*
43. Puri, B.N. (1954). *The history of the Gurjara-Pratihāras.* University of Oxford.
44. Tripathi, R.S. (1989). *History of Kanauj: to the Moslem conquest* (Delhi: Motilal Banarsidass).
45. Shashi, S.S. (1979). *The nomads of the Himalayas* (Delhi: Sundeep).
46. Bingley, A.H. (1978). *Caste, tribes & culture of Rajputs* (Ess Ess Publications).
47. Ibbetson, D.C.J. (1981). *Report on the Census of Punjab* (Calcutta).
48. Verma, Y.K. (1954). *Gurjara Itihas* (in Hindi).
49. Singh, K.S. (1998). *India's communities* (Delhi: Oxford Univ. Press).
50. Joshua Project Gujjars in Pakistan.
51. Joshua Project Gujjar in India.
52. Law, B.C. (1924). *Ancient Mid-Indian Ksatriya Tribes - Vol. I* (Calcutta: Thacker, Spink & Co.).
53. Dwivedi, R.K. (1977). *A Critical study of Changing Social Order at Yuganta: or the end of the Kali Age.* 1977 DD Kosambi Commem. Vol. Varanasi Banaras Hindu Univ.
54. Mishra, K.C. (1987). *Tribes in The Mahabharata: A socio-cultural study* (New Delhi: National Publishing House).
55. Raychaudhuri, H. (2006). *Political history of ancient India: from the accession of Parikshit to the extinction of the Gupta dynasty* (New Delhi: Cosmo Publications).
56. West, B.A. (2009). *Encyclopedia of the peoples of Asia and Oceania* (New York: Facts On File).
57. Majumdar, R.C., Pusalker, A.D., Majumdar, A.K., Ghose, D.K., and Dighe, V.G. (1966). *The History and Culture of the Indian People: The struggle for empire.*-2d ed (Bharatiya Vidya Bhavan).
58. Tapp, N., and Walker, A. (2001). *The Tai World: A Digest of Articles from the Thai-Yunnan Project Newsletter* (Department of Anthropology, Research School of Pacific and Asian Studies, The Australian National University).
59. Singh, M.R. (1972). *Geographical data in the early Purāṇas: a critical study.* Punthi Pustak Calcutta.
60. Jayswal, K.P., and Lamotte, E. *Kamboja Kingdom.*
61. (2007). *Global Indian diasporas: exploring trajectories of migration and theory* (Netherlands: Amsterdam University Press).
62. Levi, S.C. (2002). *The Indian Diaspora in Central Asia and Its Trade, 1550-1900* (Brill).
63. Syan, H.S. (2013). *Sikh militancy in the seventeenth century: religious violence in Mughal and early modern India* (London: Tauris).

64. McLane (2002). Land and local kingship 18th century bengal. (Cambridge: Cambridge Univ Press).
65. McLeod, W.H., and McLeod, W.H. (2009). The A to Z of Sikhism (Lanham: Scarecrow Press).
66. Joshua Project Khatri (Hindu traditions) in India.
67. Mahal, D.G. (2015). Ancestral Roots of the Jats DNA Revelations (DGM Associates).
68. peoplegroupsindia.com Jat – People Groups of India.
69. Crooke, W. (1896). The tribes and castes of the North-Western Provinces and Oudh (Office of the superintendent of government printing).
70. wikipedia.org (2017). Jat people.
71. Chatterji, S. History repeats itself as yet another Central govt faces a Jat stir | india | Hindustan Times.
72. Li, J.Z., Absher, D.M., Tang, H., Southwick, A.M., Casto, A.M., Ramachandran, S., Cann, H.M., Barsh, G.S., Feldman, M., Cavalli-Sforza, L.L., et al. (2008). Worldwide Human Relationships Inferred from Genome-Wide Patterns of Variation. *Science* 319, 1100–1104.
73. Behar, D.M., Yunusbayev, B., Metspalu, M., Metspalu, E., Rosset, S., Parik, J., Rootsi, S., Chaubey, G., Kutuev, I., Yudkovsky, G., et al. (2010). The genome-wide structure of the Jewish people. *Nature* 466, 238–242.
74. Yunusbayev, B., Metspalu, M., Järve, M., Kutuev, I., Rootsi, S., Metspalu, E., Behar, D.M., Varendi, K., Sahakyan, H., Khusainova, R., et al. (2012). The Caucasus as an asymmetric semipermeable barrier to ancient human migrations. *Mol. Biol. Evol.* 29, 359–365.
75. Behar, D.M., Metspalu, M., Baran, Y., Kopelman, N.M., Yunusbayev, B., Gladstein, A., Tzur, S., Sahakyan, H., Bahmanimehr, A., Yepiskoposyan, L., et al. (2013). No evidence from genome-wide data of a Khazar origin for the Ashkenazi Jews. *Hum. Biol.* 85, 859–900.
76. Yunusbayev, B., Metspalu, M., Metspalu, E., Valeev, A., Litvinov, S., Valiev, R., Akhmetova, V., Balanovska, E., Balanovsky, O., Turdikulova, S., et al. (2015). The Genetic Legacy of the Expansion of Turkic-Speaking Nomads across Eurasia. *PLOS Genet.* 11, e1005068.
77. Raghavan, M., Skoglund, P., Graf, K.E., Metspalu, M., Albrechtsen, A., Moltke, I., Rasmussen, S., Stafford, T.W., Orlando, L., Metspalu, E., et al. (2014). Upper Palaeolithic Siberian genome reveals dual ancestry of Native Americans. *Nature* 505, 87–91.
78. Kushniarevich, A., Utevska, O., Chuhryaeva, M., Agdzhoyan, A., Dibirova, K., Uktveryte, I., Möls, M., Mulahasanovic, L., Pshenichnov, A., Frolova, S., et al. (2015). Genetic Heritage of the Balto-Slavic Speaking Populations: A Synthesis of Autosomal, Mitochondrial and Y-Chromosomal Data. *PLOS ONE* 10, e0135820.
79. Metspalu, M., Romero, I.G., Yunusbayev, B., Chaubey, G., Mallick, C.B., Hudjashov, G., Nelis, M., Mägi, R., Metspalu, E., and Remm, M. (2011). Shared and unique components of human population structure and genome-wide signals of positive selection in South Asia. *Am. J. Hum. Genet.* 89, 731–744.
80. Cristofaro, J.D., Pennarun, E., Mazières, S., Myres, N.M., Lin, A.A., Temori, S.A., Metspalu, M., Metspalu, E., Witzel, M., King, R.J., et al. (2013). Afghan Hindu Kush: Where Eurasian Sub-Continent Gene Flows Converge. *PLOS ONE* 8, e76748.



81. Chaubey, G., Metspalu, M., Choi, Y., Mägi, R., Romero, I.G., Soares, P., van Oven, M., Behar, D.M., Rootsi, S., and Hudjashov, G. (2011). Population genetic structure in Indian Austroasiatic speakers: the role of landscape barriers and sex-specific admixture. *Mol. Biol. Evol.* 28, 1013–1024.
82. Consortium, I.H. 3 (2010). Integrating common and rare genetic variation in diverse human populations. *Nature* 467, 52–58.
83. Chaubey, G., Ayub, Q., Rai, N., Prakash, S., Mushrif-Tripathy, V., Mezzavilla, M., Pathak, A.K., Tamang, R., Firasat, S., Reidla, M., et al. (2017). “Like sugar in milk”: reconstructing the genetic history of the Parsi population. *Genome Biol.* 18, 110.
84. Basu, A., Sarkar-Roy, N., and Majumder, P.P. (2016). Genomic reconstruction of the history of extant populations of India reveals five distinct ancestral components and a complex structure. *Proc. Natl. Acad. Sci.* 113, 1594–1599.
85. Rasmussen, M., Guo, X., Wang, Y., Lohmueller, K.E., Rasmussen, S., Albrechtsen, A., Skotte, L., Lindgreen, S., Metspalu, M., Jombart, T., et al. (2011). An Aboriginal Australian genome reveals separate human dispersals into Asia. *Science* 334, 94–98.
86. Pierron, D., Razafindrazaka, H., Pagani, L., Ricaut, F.-X., Antao, T., Capredon, M., Sambo, C., Radimilahy, C., Rakotoarisoa, J.-A., Blench, R.M., et al. (2014). Genome-wide evidence of Austronesian–Bantu admixture and cultural reversion in a hunter-gatherer group of Madagascar. *Proc. Natl. Acad. Sci.* 111, 936–941.
87. Damgaard, P. de B., Martiniano, R., Kamm, J., Moreno-Mayar, J.V., Kroonen, G., Peyrot, M., Barjamovic, G., Rasmussen, S., Zacho, C., Baimukhanov, N., et al. (2018). The first horse herders and the impact of early Bronze Age steppe expansions into Asia. *Science* eaar7711.
88. Narasimhan, V.M., Patterson, N.J., Moorjani, P., Lazaridis, I., Mark, L., Mallick, S., Rohland, N., Bernardos, R., Kim, A.M., Nakatsuka, N., et al. (2018). The Genomic Formation of South and Central Asia. *BioRxiv* 292581.
89. Rasmussen, M., Sikora, M., Albrechtsen, A., Korneliussen, T.S., Moreno-Mayar, J.V., Poznik, G.D., Zollikofer, C.P.E., Ponce de León, M.S., Allentoft, M.E., Moltke, I., et al. (2015). The ancestry and affiliations of Kennewick Man. *Nature* 523, 455.
90. Allentoft, M.E., Sikora, M., Sjögren, K.-G., Rasmussen, S., Rasmussen, M., Stenderup, J., Damgaard, P.B., Schroeder, H., Ahlström, T., and Vinner, L. (2015). Population genomics of bronze age Eurasia. *Nature* 522, 167–172.
91. Fu, Q., Li, H., Moorjani, P., Jay, F., Slepchenko, S.M., Bondarev, A.A., Johnson, P.L.F., Aximu-Petri, A., Prüfer, K., de Filippo, C., et al. (2014). Genome sequence of a 45,000-year-old modern human from western Siberia. *Nature* 514, 445.
92. Günther, T., Malmström, H., Svensson, E.M., Omrak, A., Sánchez-Quinto, F., Kılınc, G.M., Krzewińska, M., Eriksson, G., Fraser, M., Edlund, H., et al. (2018). Population genomics of Mesolithic Scandinavia: Investigating early postglacial migration routes and high-latitude adaptation. *PLOS Biol.* 16, e2003703.
93. Jones, E.R., Gonzalez-Fortes, G., Connell, S., Siska, V., Eriksson, A., Martiniano, R., McLaughlin, R.L., Llorente, M.G., Cassidy, L.M., Gamba, C., et al. (2015). Upper Palaeolithic genomes reveal deep roots of modern Eurasians. *Nat. Commun.* 6, 8912.
94. Lazaridis, I., Patterson, N., Mittnik, A., Renaud, G., Mallick, S., Kirsanow, K., Sudmant, P.H., Schraiber, J.G., Castellano, S., Lipson, M., et al. (2014). Ancient human genomes suggest three ancestral populations for present-day Europeans. *Nature* 513, 409.

95. Mathieson, I., Lazaridis, I., Rohland, N., Mallick, S., Patterson, N., Roodenberg, S.A., Harney, E., Stewardson, K., Fernandes, D., and Novak, M. (2015). Genome-wide patterns of selection in 230 ancient Eurasians. *Nature* 528, 499–503.
96. Fu, Q., Posth, C., Hajdinjak, M., Petr, M., Mallick, S., Fernandes, D., Furtwängler, A., Haak, W., Meyer, M., Mittnik, A., et al. (2016). The genetic history of Ice Age Europe. *Nature* 534, 200.
97. Lazaridis, I., Nadel, D., Rollefson, G., Merrett, D.C., Rohland, N., Mallick, S., Fernandes, D., Novak, M., Gamarra, B., and Sirak, K. (2016). Genomic insights into the origin of farming in the ancient Near East. *Nature* 536, 419–424.
